# Supplementary material for: Unveiling the influence of oxidation state and heavy atom effects in chalcogen group on boron centered D(X)BNA core: a computational study on RTP versus TADF
Source: Royal Society of Chemistry journal article supplement (doi:10.1039/d4me00131a), 2024-11-07
Supplement: d4me00131a1.pdf [file d4me00131a1.pdf]

## Electronic Supplementary Information

### Unveiling the Influence of Oxidation State and Heavy Atom Effects in Chalcogen Group on Boron Centered D(X)BNA Core: A

#### Computational Study on RTP Versus TADF

Ramalingam Mahaan,<sup>a,b</sup> Murugesan Panneerselvam,<sup>c</sup> Luciano T. Costa<sup>c</sup> and Aruljothy John Bosco<sup>\* a</sup>

<sup>a</sup>Advanced Materials Chemistry Laboratory, Department of Chemistry, Faculty of Engineering and Technology, SRM Institute of Science and Technology, Kattankulathur - 603 203, Tamil Nadu, India.

<sup>b</sup>Department of Chemistry, Karpagam Academy of Higher Education, Coimbatore 641021, India.

<sup>c</sup>MolMod-CS - Instituto de Química, Universidade Federal Fluminense, Campos Valonginho s/n, Centro, Niterói 24020-14, Rio de Janeiro, Brazil.

*\*Corresponding author:* E-mail: [johnbosa@srmist.edu.in](mailto:johnbosa@srmist.edu.in).

#### CONTENT CAPTIONS

|                 | Tables                                                                                                                                                                                                                                              | Page No. |
|-----------------|-----------------------------------------------------------------------------------------------------------------------------------------------------------------------------------------------------------------------------------------------------|----------|
| <b>Table S1</b> | Calculated bond lengths (in Å) and dihedral angles (in °) between the core and the donor units obtained from B3LYP/6-31+G* level of theory                                                                                                          | S3       |
| <b>Table S2</b> | Calculated MPP and SDP values of the core units (in Å)                                                                                                                                                                                              | S4       |
| <b>Table S3</b> | Calculated HOMO, LUMO, H-L gaps, vertical singlet (S <sub>1</sub> ) and triplet (T <sub>1</sub> ) energies, vertical singlet-triplet energy differences ( $\Delta E_{ST}$ ) of core and donor units at the B3LYP/PBE0/ M06//6-31+G* level of theory | S4       |
| <b>Table S4</b> | The calculated HOMO and LUMO molecular orbital contribution (%) of newly designed molecules using the B3LYP/6-31+G* level of theory                                                                                                                 | S5       |

|                  |                                                                                                                                                                                                                                                              |         |
|------------------|--------------------------------------------------------------------------------------------------------------------------------------------------------------------------------------------------------------------------------------------------------------|---------|
| <b>Table S5</b>  | Calculated vertical excited state energies of the molecules with different solvents (Toluene, and Dichloromethane) using M06/6-31+G* level of theory                                                                                                         | S6      |
| <b>Table S6</b>  | The calculated vertical singlet ( $S_1$ ) and triplet ( $T_1$ ) energies, configuration interaction (CI), and overlap extents ( $I_S$ , and $I_T$ in %) of newly designed systems at M06/6-31+G* level of theory                                             | S7      |
| <b>Table S7</b>  | Calculated SOC constants between the selected states at M06/ def2-SVP level of theory for $S_0$ geometry                                                                                                                                                     | S9      |
| <b>Table S8</b>  | Calculated SOC constants between the selected states at M06/ def2-SVP level of theory for $S_1$ geometry                                                                                                                                                     | S10     |
| <b>Figures</b>   |                                                                                                                                                                                                                                                              |         |
| <b>Figure S1</b> | Chemical structures of the donor and core units, along with their HOMO and LUMO energies, were analyzed to assess their donor and acceptor strengths                                                                                                         | S11     |
| <b>Figure S2</b> | Chemical structures of newly proposed molecules                                                                                                                                                                                                              | S12     |
| <b>Figure S3</b> | Optimized geometries ( $S_0$ geometry) of newly proposed molecules as obtained at B3LYP/6-31+G* level of theory                                                                                                                                              | S13     |
| <b>Figure S4</b> | Evolution of C-X bond length (figure a) and C-B-C-C dihedral angles (figure b) for the newly proposed molecules with heavy atom and oxidation effects                                                                                                        | S14     |
| <b>Figure S5</b> | Evolution of vertical singlet ( $S_1$ ), triplet ( $T_1$ ), and $\Delta E_{ST}$ energies of newly designed molecules obtained at B3LYP functional with 6-31+G* basis set (Figures a and b represent the heavy and oxidation effect evolutions, respectively) | S15     |
| <b>Figure S6</b> | Evolution of vertical singlet ( $S_1$ ), triplet ( $T_1$ ), and $\Delta E_{ST}$ energies of newly designed molecules obtained at PBE0 functional with 6-31+G* basis set (Figures a and b represent the heavy and oxidation effect evolutions, respectively)  | S16     |
| <b>Figure S7</b> | Comparison of vertical singlet ( $S_1$ ), triplet ( $T_1$ ), and $\Delta E_{ST}$ energies of the molecules using different solvent models with gas-phase medium obtained at the M06/6-31+G* level of theory                                                  | S17     |
|                  | Cartesian coordinates of optimized structures obtained from B3LYP/6-31+G* level of theory                                                                                                                                                                    | S18-S38 |

**Table S1.** Calculated bond lengths (in Å) and dihedral angles (in °) between the core and the donor units obtained from B3LYP/6-31+G\* level of theory.

| <b>Molecules</b> | <b>C-X</b> | <b>C-X'</b> | <b>B-C</b> | <b>C-B-C-C</b> | <b>C-N</b> | <b>C-N-C-C</b> |
|------------------|------------|-------------|------------|----------------|------------|----------------|
| <b>1</b>         | 1.374      | 1.365       | 1.523      | 3.41           | 1.421      | 121.16         |
| <b>2</b>         | 1.771      | 1.770       | 1.545      | 25.15          | 1.421      | 121.05         |
| <b>3</b>         | 1.910      | 1.913       | 1.554      | 30.69          | 1.421      | 121.29         |
| <b>4</b>         | 2.117      | 2.127       | 1.568      | 36.26          | 1.421      | 120.87         |
| <b>5</b>         | 1.822      | 1.824       | 1.559      | 31.55          | 1.418      | 123.80         |
| <b>6</b>         | 1.805      | 1.806       | 1.569      | 31.64          | 1.417      | 124.94         |
| <b>7</b>         | 1.963      | 1.969       | 1.568      | 36.91          | 1.418      | 124.10         |
| <b>8</b>         | 1.374      | 1.365       | 1.524      | 1.01           | 1.436      | 90.20          |
| <b>9</b>         | 1.770      | 1.770       | 1.545      | 25.16          | 1.436      | 90.25          |
| <b>10</b>        | 1.910      | 1.913       | 1.554      | 30.69          | 1.436      | 90.45          |
| <b>11</b>        | 2.117      | 2.127       | 1.568      | 36.24          | 1.436      | 90.03          |
| <b>12</b>        | 1.822      | 1.824       | 1.559      | 31.50          | 1.435      | 90.72          |
| <b>13</b>        | 1.805      | 1.806       | 1.569      | 31.63          | 1.434      | 90.52          |
| <b>14</b>        | 1.964      | 1.969       | 1.568      | 36.86          | 1.435      | 90.62          |

**Table S2.** Calculated MPP and SDP values of the core units (in Å).

| Core Units                  | MPP   | SDP   |
|-----------------------------|-------|-------|
| DOBNA (O)                   | 0.000 | 0.000 |
| DTBNA (S)                   | 0.443 | 1.647 |
| DSBNA (Se)                  | 0.572 | 2.241 |
| DTeBNA (Te)                 | 0.707 | 2.864 |
| DTBNA-DO (SO)               | 0.665 | 2.368 |
| DTBNA-TO (SO <sub>2</sub> ) | 0.921 | 4.651 |
| DSBNA-DO (SeO)              | 0.780 | 2.776 |

**Table S3.** Calculated HOMO, LUMO, H-L gaps, vertical singlet (S<sub>1</sub>) and triplet (T<sub>1</sub>) energies, vertical singlet-triplet energy differences ( $\Delta E_{ST}$ ) of core and donor units at the B3LYP/PBE0/ M06//6-31+G\* level of theory. (All values are in eV)

| Units    | B3LYP |       |         | B3LYP          |                |                 | PBE0           |                |                 | M06            |                |                 |
|----------|-------|-------|---------|----------------|----------------|-----------------|----------------|----------------|-----------------|----------------|----------------|-----------------|
|          | HOMO  | LUMO  | H-L Gap | S <sub>1</sub> | T <sub>1</sub> | $\Delta E_{ST}$ | S <sub>1</sub> | T <sub>1</sub> | $\Delta E_{ST}$ | S <sub>1</sub> | T <sub>1</sub> | $\Delta E_{ST}$ |
| DOBNA    | -5.92 | -2.00 | 3.91    | 3.37           | 2.87           | 0.50            | 3.48           | 2.93           | 0.55            | 3.49           | 2.99           | 0.50            |
| DTBNA    | -5.67 | -2.18 | 3.49    | 2.92           | 2.51           | 0.41            | 3.05           | 2.56           | 0.49            | 3.04           | 2.62           | 0.42            |
| DSBNA    | -5.60 | -2.26 | 3.34    | 2.78           | 2.40           | 0.38            | 2.88           | 2.46           | 0.42            | 2.89           | 2.50           | 0.39            |
| DTeBNA   | -5.45 | -2.29 | 3.16    | 2.55           | 2.28           | 0.27            | 2.63           | 2.32           | 0.31            | 2.66           | 2.38           | 0.28            |
| DTBNA-DO | -6.59 | -3.05 | 3.55    | 2.85           | 2.68           | 0.17            | 3.00           | 2.76           | 0.24            | 3.07           | 2.80           | 0.27            |
| DTBNA-TO | -7.73 | -3.47 | 4.26    | 3.56           | 2.90           | 0.66            | 3.69           | 2.84           | 0.85            | 3.68           | 2.85           | 0.83            |
| DSBNA-DO | -6.59 | -3.08 | 3.51    | 2.82           | 2.72           | 0.10            | 2.97           | 2.84           | 0.13            | 2.99           | 2.87           | 0.12            |
| P-CBZ    | -5.64 | -1.01 | 4.62    | 3.98           | 3.15           | 0.83            | 4.09           | 3.04           | 1.05            | 4.02           | 3.01           | 1.01            |
| P-DMAC   | -5.13 | -0.81 | 4.32    | 3.53           | 3.17           | 0.36            | 3.69           | 3.08           | 0.61            | 3.70           | 3.09           | 0.61            |

**Table S4.** The calculated HOMO and LUMO molecular orbital contribution (%) of newly designed molecules using the B3LYP/6-31+G\* level of theory.

| <b>Molecules</b> | <b>Orbital</b> | <b>Energy (eV)</b> | <b>CBZ (%)</b> | <b>Phenyl (%)</b> | <b>Core (%)</b> |
|------------------|----------------|--------------------|----------------|-------------------|-----------------|
| <b>1</b>         | HOMO           | -5.65              | 85.82          | 10.98             | -               |
|                  | LUMO           | -2.18              | -              | 10.80             | 88.09           |
| <b>2</b>         | HOMO           | -5.65              | 78.17          | 10.45             | 11.39           |
|                  | LUMO           | -2.32              | -              | 8.31              | 90.83           |
| <b>3</b>         | HOMO           | -5.63              | 50.73          | 7.49              | 41.77           |
|                  | LUMO           | -2.40              | -              | 7.41              | 91.83           |
| <b>4</b>         | HOMO           | -5.51              | -              | -                 | 97.70           |
|                  | LUMO           | -2.42              | -              | 6.90              | 92.39           |
| <b>5</b>         | HOMO           | -5.76              | 86.63          | 11.15             | -               |
|                  | LUMO           | -3.10              | -              | 5.08              | 94.34           |
| <b>6</b>         | HOMO           | -5.82              | 86.84          | 11.09             | -               |
|                  | LUMO           | -3.48              | -              | -                 | 95.56           |
| <b>7</b>         | HOMO           | -5.76              | 86.65          | 11.17             | -               |
|                  | LUMO           | -3.13              | -              | 5.01              | 94.41           |
| <b>8</b>         | HOMO           | -5.17              | 96.26          | -                 | -               |
|                  | LUMO           | -2.18              | -              | 10.96             | 88.39           |
| <b>9</b>         | HOMO           | -5.18              | 96.27          | -                 | -               |
|                  | LUMO           | -2.33              | -              | 8.43              | 91.07           |
| <b>10</b>        | HOMO           | -5.18              | 96.29          | -                 | -               |
|                  | LUMO           | -2.40              | -              | 5.04              | 94.67           |
| <b>11</b>        | HOMO           | -5.17              | 96.32          | -                 | -               |
|                  | LUMO           | -2.42              | -              | -                 | 95.89           |
| <b>12</b>        | HOMO           | -5.25              | 96.27          | -                 | -               |
|                  | LUMO           | -3.11              | -              | 7.51              | 92.06           |
| <b>13</b>        | HOMO           | -5.30              | 97.73          | -                 | -               |

|           |      |       |       |      |       |
|-----------|------|-------|-------|------|-------|
|           | LUMO | -3.50 | -     | 4.97 | 94.75 |
| <b>14</b> | HOMO | -5.26 | 96.26 |      | -     |
|           | LUMO | -3.14 | -     | 7.03 | 92.55 |

**Table S5.** Calculated vertical excited state energies of the molecules with different solvents (Toluene, and Dichloromethane) using M06/6-31+G\* level of theory. (All the values are in eV)

| <b>Molecules</b> | <b>Toluene</b>       |                      |                        | <b>Dichloromethane</b> |                      |                        |
|------------------|----------------------|----------------------|------------------------|------------------------|----------------------|------------------------|
|                  | <b>S<sub>1</sub></b> | <b>T<sub>1</sub></b> | <b>ΔE<sub>ST</sub></b> | <b>S<sub>1</sub></b>   | <b>T<sub>1</sub></b> | <b>ΔE<sub>ST</sub></b> |
| <b>1</b>         | 3.35                 | 2.85                 | 0.50                   | 3.37                   | 2.86                 | 0.51                   |
| <b>2</b>         | 2.96                 | 2.57                 | 0.38                   | 2.97                   | 2.58                 | 0.39                   |
| <b>3</b>         | 2.82                 | 2.47                 | 0.34                   | 2.83                   | 2.49                 | 0.35                   |
| <b>4</b>         | 2.60                 | 2.36                 | 0.24                   | 2.61                   | 2.36                 | 0.24                   |
| <b>5</b>         | 2.72                 | 2.50                 | 0.22                   | 2.79                   | 2.53                 | 0.26                   |
| <b>6</b>         | 2.39                 | 2.27                 | 0.13                   | 2.43                   | 2.29                 | 0.14                   |
| <b>7</b>         | 2.70                 | 2.50                 | 0.20                   | 2.78                   | 2.53                 | 0.25                   |
| <b>8</b>         | 3.00                 | 2.90                 | 0.11                   | 3.05                   | 2.90                 | 0.14                   |
| <b>9</b>         | 2.91                 | 2.58                 | 0.34                   | 2.95                   | 2.58                 | 0.37                   |
| <b>10</b>        | 2.82                 | 2.48                 | 0.34                   | 2.83                   | 2.49                 | 0.35                   |
| <b>11</b>        | 2.60                 | 2.35                 | 0.25                   | 2.60                   | 2.36                 | 0.24                   |
| <b>12</b>        | 2.29                 | 2.29                 | 0.00                   | 2.38                   | 2.38                 | 0.00                   |
| <b>13</b>        | 1.94                 | 1.94                 | 0.00                   | 2.00                   | 2.00                 | 0.00                   |
| <b>14</b>        | 2.27                 | 2.27                 | 0.00                   | 2.37                   | 2.37                 | 0.00                   |

**Table S6.** The calculated vertical singlet ( $S_1$ ) and triplet ( $T_1$ ) energies, configuration interaction (CI), and overlap extents ( $I_S$ , and  $I_T$  in %) of newly designed systems at M06/6-31+G\* level of theory.

| Molecules | State | Energy | CI                                                                                                                                  | $\Delta E_{ST}$ | $I_S$ | $I_T$ |
|-----------|-------|--------|-------------------------------------------------------------------------------------------------------------------------------------|-----------------|-------|-------|
| 1         | $S_1$ | 3.36   | H $\rightarrow$ L 62.1%, H-1 $\rightarrow$ L 31.8%                                                                                  | 0.52            | 36.86 | 50.92 |
|           | $T_1$ | 2.84   | H $\rightarrow$ L 25.2%, H-3 $\rightarrow$ L 19.8%, H-1 $\rightarrow$ L 19.0%, H $\rightarrow$ L+1 7.8%, H-3 $\rightarrow$ L+1 5.7% |                 |       |       |
| 2         | $S_1$ | 2.98   | H $\rightarrow$ L 51.3%, H-1 $\rightarrow$ L 46.0%                                                                                  | 0.42            | 48.09 | 48.37 |
|           | $T_1$ | 2.56   | H $\rightarrow$ L 49.5%, H-1 $\rightarrow$ L 41.0%                                                                                  |                 |       |       |
| 3         | $S_1$ | 2.83   | H $\rightarrow$ L 97.3%                                                                                                             | 0.37            | 47.31 | 47.52 |
|           | $T_1$ | 2.46   | H $\rightarrow$ L 58.4%, H-4 $\rightarrow$ L 14.6%, H-3 $\rightarrow$ L 8.6%                                                        |                 |       |       |
| 4         | $S_1$ | 2.61   | H $\rightarrow$ L 98.7%                                                                                                             | 0.27            | 48.39 | 48.39 |
|           | $T_1$ | 2.34   | H $\rightarrow$ L 80.7%, H-2 $\rightarrow$ L 10.9%                                                                                  |                 |       |       |
| 5         | $S_1$ | 2.68   | H $\rightarrow$ L 68.4%, H-1 $\rightarrow$ L 29.4%                                                                                  | 0.20            | 18.08 | 29.96 |
|           | $T_1$ | 2.48   | H $\rightarrow$ L 66.4%, H-1 $\rightarrow$ L 25.5%                                                                                  |                 |       |       |
| 6         | $S_1$ | 2.38   | H $\rightarrow$ L 97.8%                                                                                                             | 0.13            | 16.67 | 22.45 |
|           | $T_1$ | 2.25   | H $\rightarrow$ L 64.6%, H-4 $\rightarrow$ L 15.0%                                                                                  |                 |       |       |
| 7         | $S_1$ | 2.65   | H $\rightarrow$ L 97.8%                                                                                                             | 0.19            | 17.78 | 27.36 |
|           | $T_1$ | 2.46   | H $\rightarrow$ L 93.6%                                                                                                             |                 |       |       |
| 8         | $S_1$ | 2.94   | H $\rightarrow$ L 90.6%, H $\rightarrow$ L+1 7.9%                                                                                   | 0.05            | 06.80 | 63.14 |
|           | $T_1$ | 2.89   | H-1 $\rightarrow$ L 49.6%, H-2 $\rightarrow$ L 21.7%, H-2 $\rightarrow$ L+1 8.5%                                                    |                 |       |       |
| 9         | $S_1$ | 2.86   | H $\rightarrow$ L 92.8%, H $\rightarrow$ L+1 5.7%                                                                                   | 0.29            | 05.96 | 57.24 |
|           | $T_1$ | 2.57   | H-1 $\rightarrow$ L 91.4%                                                                                                           |                 |       |       |
| 10        | $S_1$ | 2.79   | H $\rightarrow$ L 98.2%                                                                                                             | 0.33            | 05.51 | 54.13 |
|           | $T_1$ | 2.46   | H $\rightarrow$ L 98.1%                                                                                                             |                 |       |       |
| 11        | $S_1$ | 2.69   | H $\rightarrow$ L 99.0%                                                                                                             | 0.37            | 47.75 | 47.75 |
|           | $T_1$ | 2.32   | H $\rightarrow$ L 99.0%                                                                                                             |                 |       |       |
| 12        | $S_1$ | 2.21   | H-1 $\rightarrow$ L 92.4%                                                                                                           | 0.00            | 04.23 | 04.23 |
|           | $T_1$ | 2.21   | H-1 $\rightarrow$ L 92.4%                                                                                                           |                 |       |       |
| 13        | $S_1$ | 1.89   | H $\rightarrow$ L 98.3%                                                                                                             | 0.00            | 03.76 | 03.76 |
|           | $T_1$ | 1.89   | H $\rightarrow$ L 98.2%                                                                                                             |                 |       |       |

|           |                |      |               |      |       |       |
|-----------|----------------|------|---------------|------|-------|-------|
| <b>14</b> | S <sub>1</sub> | 2.17 | H-1 → L 98.2% | 0.00 | 04.18 | 04.18 |
|           | T <sub>1</sub> | 2.17 | H-1 → L 93.9% |      |       |       |



**Table S7.** Calculated SOC constants between the selected states at M06/def2-SVP level of theory for  $S_0$  geometry. (All the values in  $\text{cm}^{-1}$ )

| <b>Molecules</b> | <b><math>S_0</math>-Geometry</b>           |                                            |                                            |
|------------------|--------------------------------------------|--------------------------------------------|--------------------------------------------|
|                  | $\langle S_1   \hat{H}_{SO}   T_1 \rangle$ | $\langle T_1   \hat{H}_{SO}   S_0 \rangle$ | $\langle S_1   \hat{H}_{SO}   T_2 \rangle$ |
| <b>1</b>         | 0.192                                      | 0.314                                      | 0.045                                      |
| <b>2</b>         | 0.311                                      | 2.003                                      | 0.481                                      |
| <b>3</b>         | 2.184                                      | 12.376                                     | 4.616                                      |
| <b>4</b>         | 7.315                                      | 69.152                                     | 15.635                                     |
| <b>5</b>         | 0.283                                      | 0.558                                      | 0.962                                      |
| <b>6</b>         | 0.186                                      | 0.766                                      | 0.293                                      |
| <b>7</b>         | 0.186                                      | 1.469                                      | 3.254                                      |
| <b>8</b>         | 0.383                                      | 0.520                                      | 0.301                                      |
| <b>9</b>         | 0.485                                      | 2.138                                      | 0.428                                      |
| <b>10</b>        | 2.248                                      | 12.526                                     | 4.073                                      |
| <b>11</b>        | 7.667                                      | 69.406                                     | 16.043                                     |
| <b>12</b>        | 0.280                                      | 0.621                                      | 0.303                                      |
| <b>13</b>        | 0.238                                      | 0.402                                      | 0.398                                      |
| <b>14</b>        | 0.347                                      | 1.858                                      | 0.430                                      |

**Table S8.** Calculated SOC constants between the selected states at M06/def2-SVP level of theory for  $S_1$  geometry. (All the values in  $\text{cm}^{-1}$ )

| <b>Molecules</b> | <b><math>S_1</math>-Geometry</b>           |                                            |                                            |
|------------------|--------------------------------------------|--------------------------------------------|--------------------------------------------|
|                  | $\langle S_1   \hat{H}_{SO}   T_1 \rangle$ | $\langle T_1   \hat{H}_{SO}   S_0 \rangle$ | $\langle S_1   \hat{H}_{SO}   T_2 \rangle$ |
| <b>1</b>         | 0.372                                      | 0.411                                      | 0.092                                      |
| <b>2</b>         | 0.426                                      | 1.295                                      | 0.494                                      |
| <b>3</b>         | 2.162                                      | 7.466                                      | 4.594                                      |
| <b>4</b>         | 8.296                                      | 75.436                                     | 20.983                                     |
| <b>5</b>         | 0.265                                      | 0.970                                      | 0.400                                      |
| <b>6</b>         | 0.070                                      | 0.489                                      | 0.361                                      |
| <b>7</b>         | 0.304                                      | 1.134                                      | 1.687                                      |
| <b>8</b>         | 0.272                                      | 0.878                                      | 0.462                                      |
| <b>9</b>         | 0.385                                      | 1.869                                      | 0.531                                      |
| <b>10</b>        | 2.224                                      | 13.643                                     | 6.099                                      |
| <b>11</b>        | 11.519                                     | 67.349                                     | 21.512                                     |
| <b>12</b>        | 0.261                                      | 0.553                                      | 0.308                                      |
| <b>13</b>        | 0.142                                      | 0.390                                      | 0.434                                      |
| <b>14</b>        | 0.312                                      | 0.555                                      | 0.162                                      |

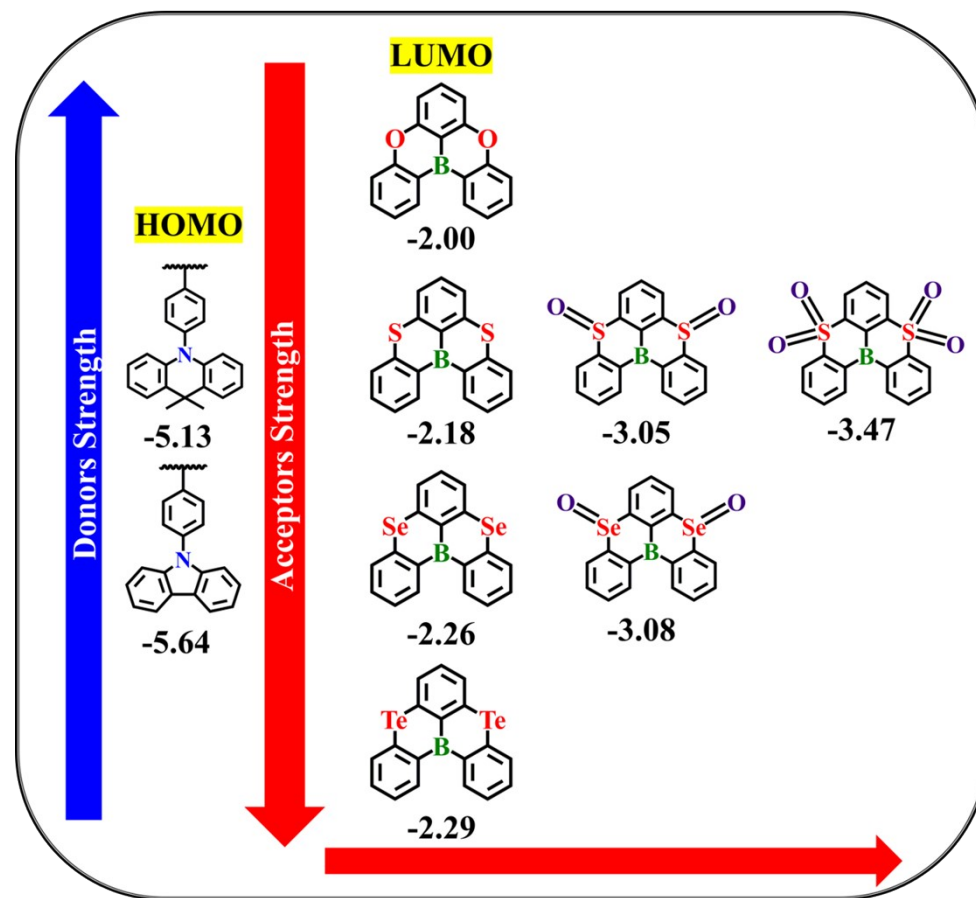

**Figure S1.** Chemical structures of the donor and core units, along with their HOMO and LUMO energies (all values in eV), were analyzed to assess their donor and acceptor strengths.

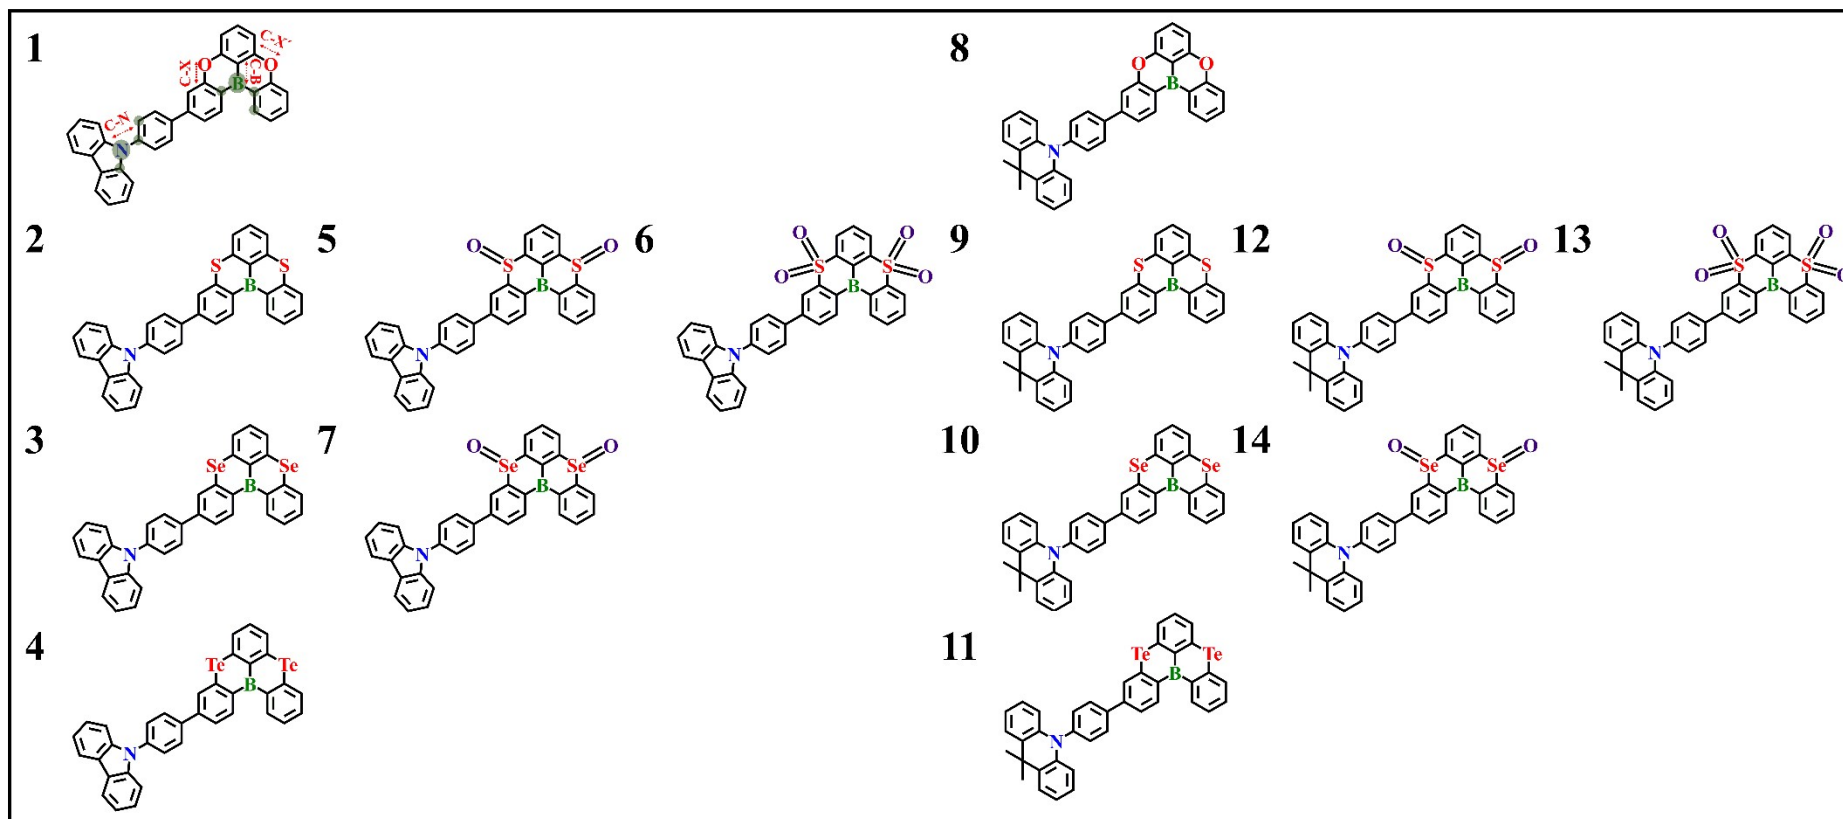

**Figure S2.** Chemical structures of newly proposed molecules.

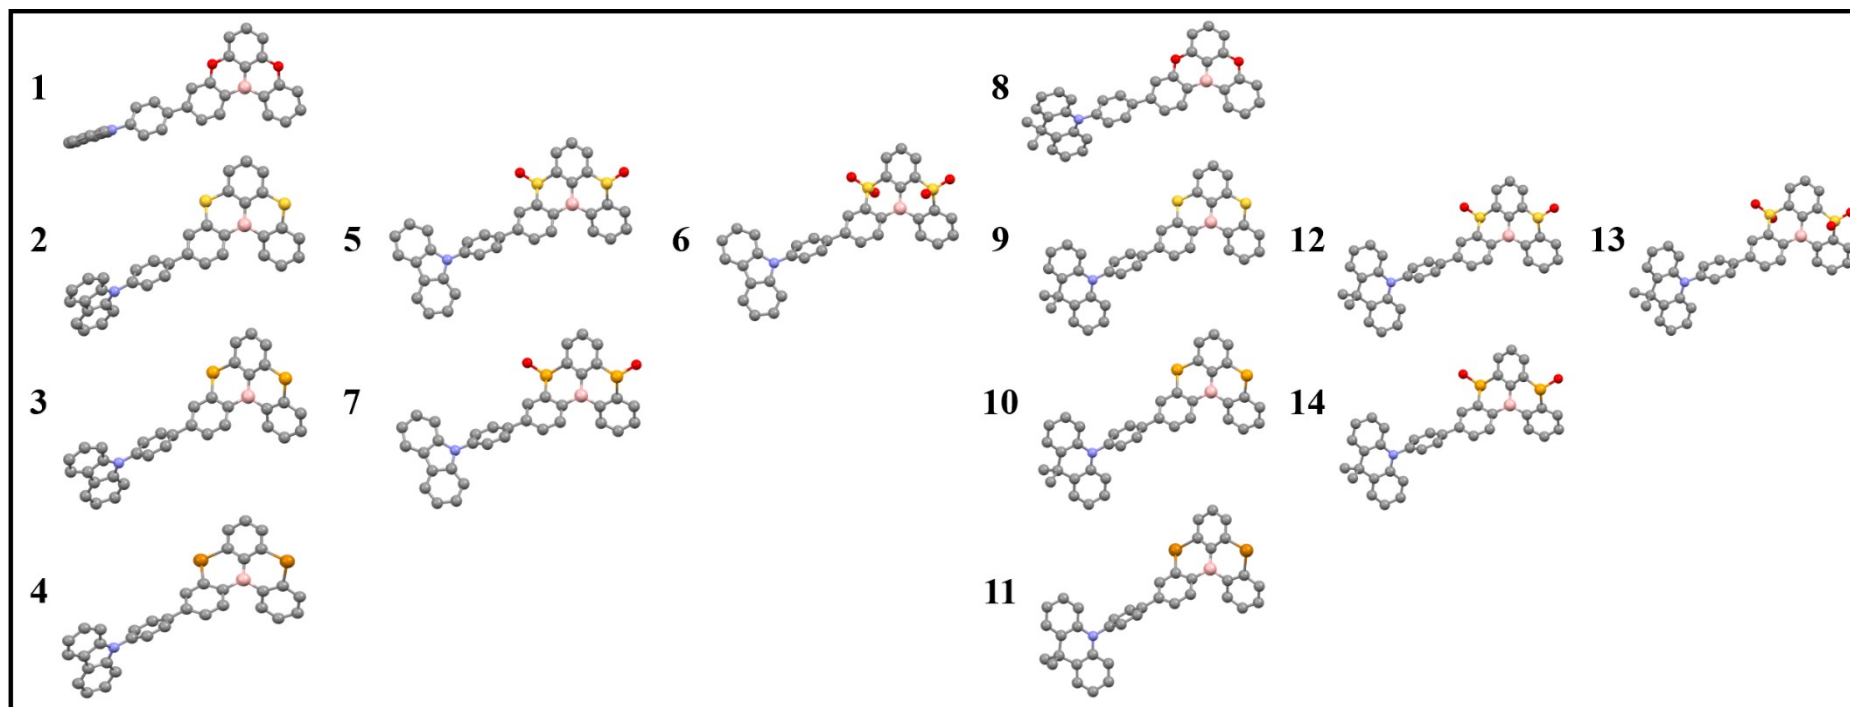

**Figure S3.** Optimized geometries ( $S_0$  geometry) of newly proposed molecules as obtained at B3LYP/6-31+G\* level of theory. The hydrogen atoms are omitted here for clarity.

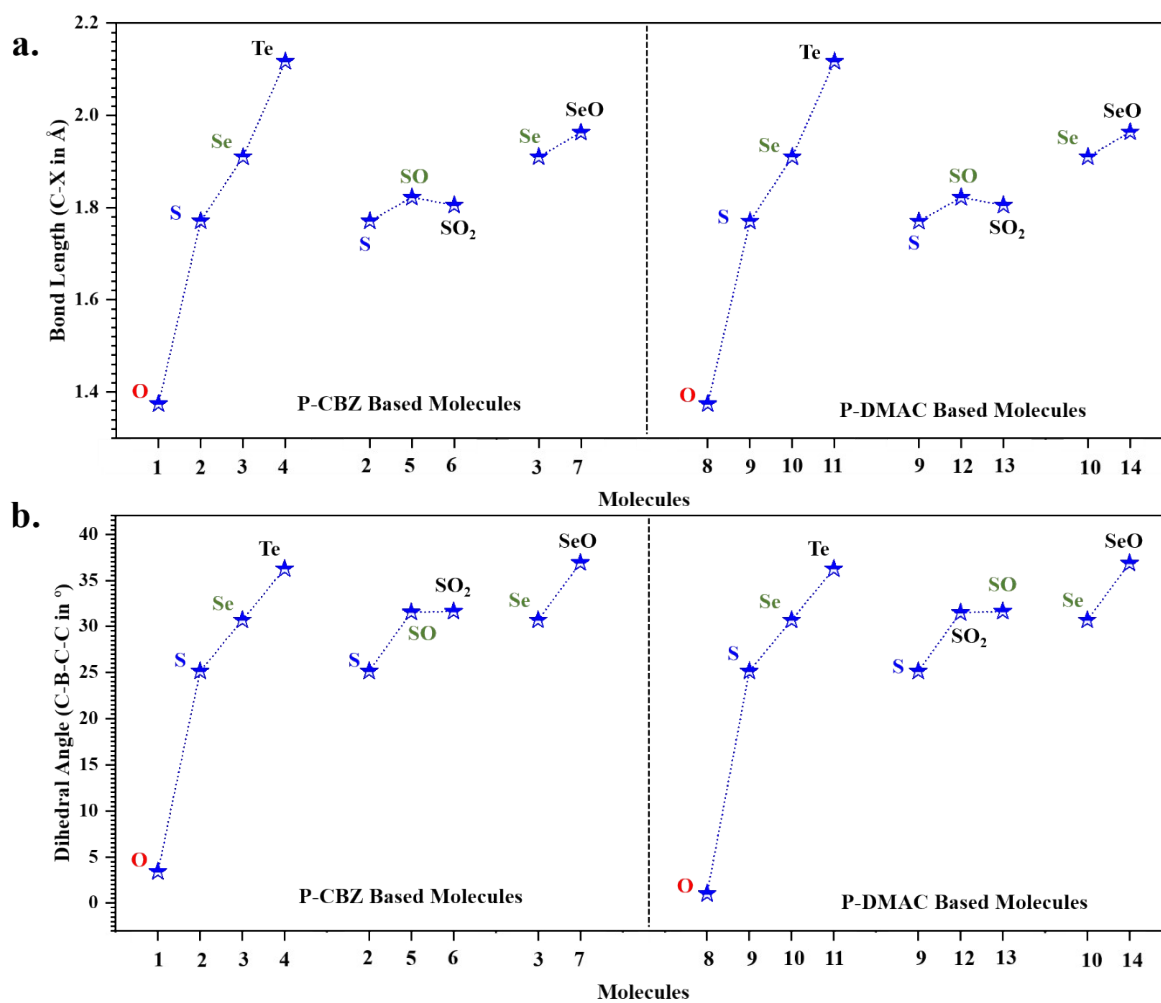

**Figure S4.** Evolution of C-X bond length (figure a) and C-B-C-C dihedral angles (figure b) for the newly proposed molecules with heavy atom and oxidation effects.

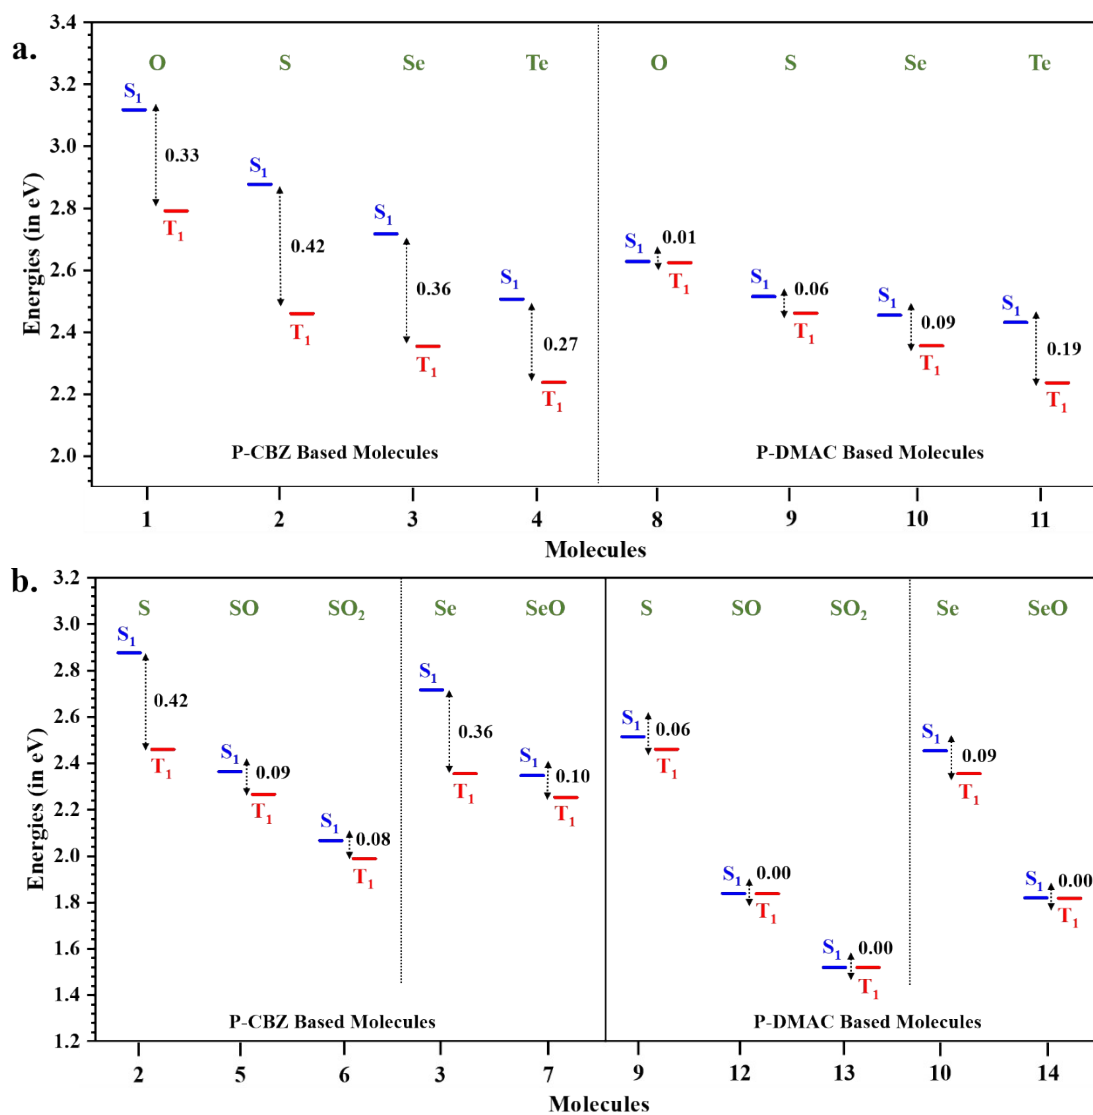

**Figure S5.** Evolution of vertical singlet ( $S_1$ ), triplet ( $T_1$ ), and  $\Delta E_{ST}$  energies of newly designed molecules obtained at B3LYP functional with 6-31+G\* basis set (Figures a and b represent the heavy and oxidation effect evolutions, respectively).

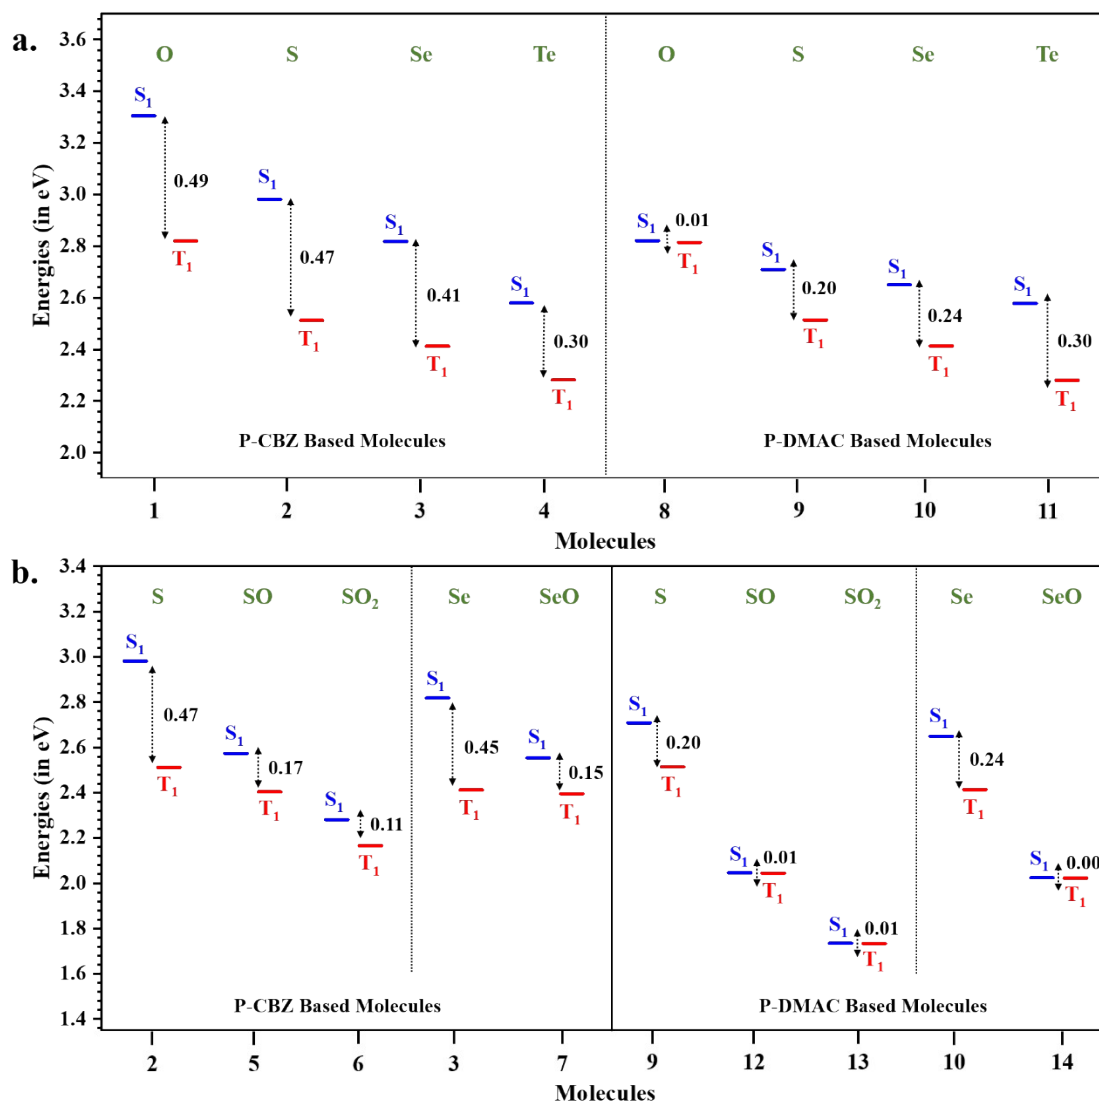

**Figure S6.** Evolution of vertical singlet ( $S_1$ ), triplet ( $T_1$ ), and  $\Delta E_{ST}$  energies of newly designed molecules obtained at PBE0 functional with 6-31+G\* basis set (Figures a and b represent the heavy and oxidation effect evolutions, respectively).



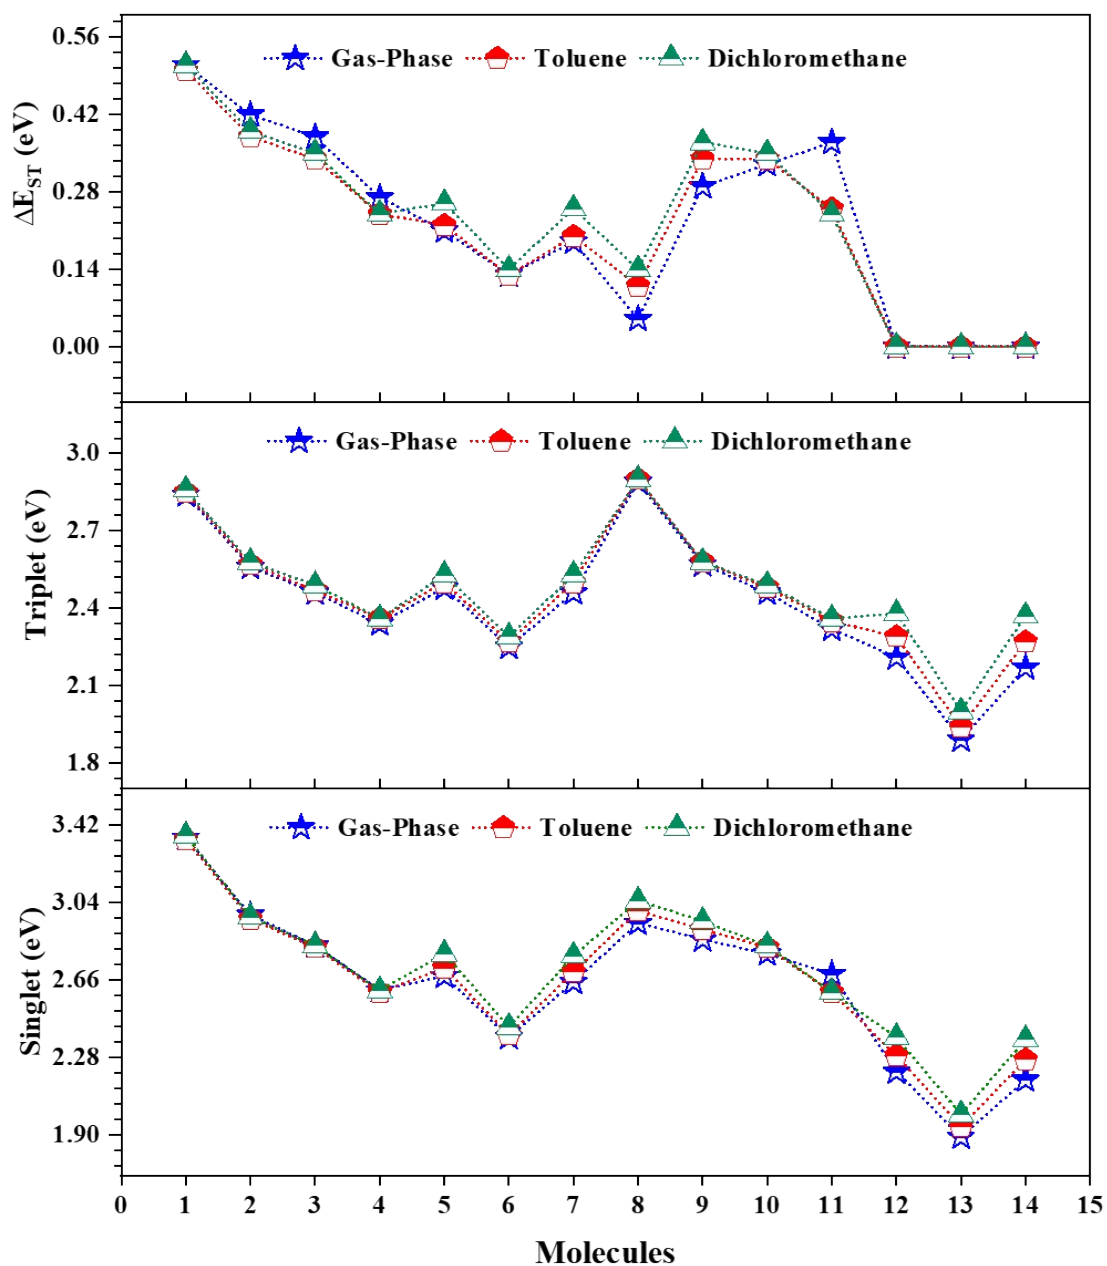

**Figure S7.** Comparison of vertical singlet ( $S_1$ ), triplet ( $T_1$ ), and  $\Delta E_{ST}$  energies of the molecules using different solvent models with gas-phase medium obtained at the M06/6-31+G\* level of theory.

**Cartesian coordinates of optimized structures obtained from B3LYP/6-31+G\* level of theory. (All the cartesian coordinates are in Å)**

Molecule-1

| Atoms | x           | y           | z           |
|-------|-------------|-------------|-------------|
| C     | 6.00494200  | 1.33463700  | -0.29135000 |
| C     | 5.82866300  | 2.71826500  | -0.54303500 |
| C     | 7.34913100  | 0.89174900  | -0.24426600 |
| C     | 6.89291500  | 3.58656900  | -0.74665800 |
| H     | 4.82405200  | 3.12436900  | -0.56840100 |
| C     | 8.43850700  | 1.75059600  | -0.45329900 |
| C     | 8.20774300  | 3.09513600  | -0.70636500 |
| H     | 6.70919100  | 4.64090000  | -0.93493100 |
| H     | 9.44385500  | 1.34299100  | -0.40680400 |
| C     | 3.34559700  | 0.35338900  | -0.09471500 |
| C     | 2.54529900  | 1.47236800  | -0.43249400 |
| C     | 2.62207800  | -0.81674500 | 0.23794900  |
| C     | 1.15959200  | 1.43976600  | -0.42784500 |
| H     | 3.02886800  | 2.40167800  | -0.71039700 |
| C     | 1.22263900  | -0.86800000 | 0.25514000  |
| C     | 0.46886800  | 0.25912800  | -0.07454800 |
| H     | 0.60037000  | 2.33861500  | -0.67154900 |
| H     | 0.74581000  | -1.81266200 | 0.49766800  |
| C     | 5.42949300  | -1.11582900 | 0.26453800  |
| C     | 4.56653500  | -2.18931600 | 0.55702600  |
| C     | 6.81072300  | -1.38846900 | 0.28426700  |
| C     | 5.03578400  | -3.46823700 | 0.85614500  |
| C     | 7.32044400  | -2.65441300 | 0.57487100  |
| C     | 6.41721900  | -3.68202000 | 0.85932800  |
| H     | 4.33475100  | -4.26680400 | 1.07601600  |
| H     | 8.39277600  | -2.82045900 | 0.57848500  |
| H     | 6.79865900  | -4.67345600 | 1.08904300  |
| H     | 9.04834600  | 3.76533200  | -0.86680300 |
| C     | -1.01532700 | 0.21396100  | -0.05982700 |
| C     | -1.71045600 | -0.50402400 | 0.92940800  |
| C     | -1.77035200 | 0.88862900  | -1.03557600 |
| C     | -3.10328100 | -0.55568000 | 0.94031500  |
| H     | -1.15542600 | -1.01944900 | 1.70836400  |
| C     | -3.16373500 | 0.85393700  | -1.02267900 |
| H     | -1.26249600 | 1.43742000  | -1.82381100 |
| C     | -3.84090800 | 0.12712700  | -0.03521600 |
| H     | -3.62439900 | -1.12482000 | 1.70466500  |
| H     | -3.73210400 | 1.38978300  | -1.77736100 |
| C     | -6.07517700 | -0.38812100 | -1.05950300 |
| C     | -6.08445600 | 0.50635400  | 1.02763700  |
| C     | -5.71128300 | -0.93887900 | -2.29288500 |
| C     | -7.43468400 | -0.26699400 | -0.67035700 |
| C     | -5.73356300 | 1.07820500  | 2.25517400  |
| C     | -7.44062400 | 0.30416000  | 0.66112300  |
| C     | -6.73462300 | -1.35354700 | -3.14565600 |

|   |             |             |             |
|---|-------------|-------------|-------------|
| H | -4.66961600 | -1.04695700 | -2.57884200 |
| C | -8.44321700 | -0.69124700 | -1.54557600 |
| C | -6.76547900 | 1.43141200  | 3.12512100  |
| H | -4.69555100 | 1.24791100  | 2.52401700  |
| C | -8.45794000 | 0.66782300  | 1.55327500  |
| C | -8.08849300 | -1.22938200 | -2.78136200 |
| H | -6.47739800 | -1.78397600 | -4.11006600 |
| H | -9.48950200 | -0.60534800 | -1.26259700 |
| C | -8.11541300 | 1.22664900  | 2.78330700  |
| H | -6.51836200 | 1.87652600  | 4.08550000  |
| H | -9.50180200 | 0.51945400  | 1.28773700  |
| H | -8.86181000 | -1.56085000 | -3.46897400 |
| H | -8.89556900 | 1.51154600  | 3.48394400  |
| N | -5.26153300 | 0.08358300  | -0.02277800 |
| B | 4.89539000  | 0.27342900  | -0.05919200 |
| O | 3.21164500  | -2.01419900 | 0.56272100  |
| O | 7.71937700  | -0.40676600 | 0.01128400  |

Molecule-2

| Atoms | x           | y           | z           |
|-------|-------------|-------------|-------------|
| C     | 5.42184700  | 1.51853600  | -0.31317900 |
| C     | 4.88949400  | 2.81927200  | -0.12829900 |
| C     | 6.77116200  | 1.45066600  | -0.73957500 |
| C     | 5.61540700  | 3.97230800  | -0.40405700 |
| H     | 3.88128600  | 2.91742700  | 0.26236600  |
| C     | 7.50487600  | 2.60992700  | -1.04947300 |
| C     | 6.92539400  | 3.86337100  | -0.89042600 |
| H     | 5.17067500  | 4.95057400  | -0.24179400 |
| H     | 8.53549200  | 2.52538300  | -1.38557600 |
| C     | 3.04104300  | 0.20023600  | -0.03177900 |
| C     | 2.27337100  | 1.10527900  | -0.80536000 |
| C     | 2.30281400  | -0.78314200 | 0.67062400  |
| C     | 0.88619200  | 1.08305400  | -0.83457600 |
| H     | 2.79143600  | 1.84307300  | -1.41021600 |
| C     | 0.89925400  | -0.79633400 | 0.66975700  |
| C     | 0.16958100  | 0.13953500  | -0.07043700 |
| H     | 0.34896000  | 1.81633400  | -1.42972200 |
| H     | 0.37307600  | -1.57976000 | 1.20932800  |
| C     | 5.35595900  | -1.07006600 | 0.33601200  |
| C     | 4.73233400  | -2.14291000 | 1.03005000  |
| C     | 6.71658700  | -1.26468800 | -0.02753700 |
| C     | 5.41907400  | -3.32164500 | 1.34764900  |
| C     | 7.40346600  | -2.44871700 | 0.27208100  |
| C     | 6.75029100  | -3.46769200 | 0.96195800  |
| H     | 4.91156700  | -4.12506800 | 1.87470000  |
| H     | 8.44506100  | -2.56390100 | -0.01541300 |
| H     | 7.28326000  | -4.38429300 | 1.20131200  |
| H     | 7.50287300  | 4.75561800  | -1.11910200 |
| C     | -1.31502300 | 0.11612100  | -0.07207900 |

|   |             |             |             |
|---|-------------|-------------|-------------|
| C | -2.03728400 | -0.15903500 | 1.10271600  |
| C | -2.04372500 | 0.36980300  | -1.24779800 |
| C | -3.43082200 | -0.18891200 | 1.10423000  |
| H | -1.50304400 | -0.33950400 | 2.03154800  |
| C | -3.43745900 | 0.35668800  | -1.25089000 |
| H | -1.51484400 | 0.56725300  | -2.17608900 |
| C | -4.14183300 | 0.07301200  | -0.07380100 |
| H | -3.97299600 | -0.41487800 | 2.01784200  |
| H | -3.98526200 | 0.56606200  | -2.16510700 |
| C | -6.36881900 | -0.77394100 | -0.86736400 |
| C | -6.39429500 | 0.85480100  | 0.71479600  |
| C | -5.99584500 | -1.76070300 | -1.78615800 |
| C | -7.73174100 | -0.49841200 | -0.58308400 |
| C | -6.05231200 | 1.85156800  | 1.63484600  |
| C | -7.74801600 | 0.54124700  | 0.42585800  |
| C | -7.01317200 | -2.46118900 | -2.43481500 |
| H | -4.95202800 | -1.98140600 | -1.98680300 |
| C | -8.73408500 | -1.21648900 | -1.24851300 |
| C | -7.09108000 | 2.52327300  | 2.27998700  |
| H | -5.01575400 | 2.10113100  | 1.83928400  |
| C | -8.77234400 | 1.23087800  | 1.08786900  |
| C | -8.37004400 | -2.19249200 | -2.17450800 |
| H | -6.74884500 | -3.23231100 | -3.15384800 |
| H | -9.78289300 | -1.01760000 | -1.04209400 |
| C | -8.43898500 | 2.21668400  | 2.01505300  |
| H | -6.85094400 | 3.30131500  | 3.00006300  |
| H | -9.81445000 | 1.00260300  | 0.87794900  |
| H | -9.13848000 | -2.75515000 | -2.69758800 |
| H | -9.22468600 | 2.75746700  | 2.53555500  |
| N | -5.56293500 | 0.05185200  | -0.07484100 |
| B | 4.59795600  | 0.23222400  | -0.00568900 |
| S | 3.06136400  | -2.07503500 | 1.61421200  |
| S | 7.65386900  | -0.07082800 | -0.93877000 |

Molecule-3

| Atoms | x          | y           | z           |
|-------|------------|-------------|-------------|
| C     | 4.74665800 | 1.71850900  | -0.09932400 |
| C     | 4.17037000 | 2.92370300  | 0.37312400  |
| C     | 6.04830200 | 1.81565600  | -0.64173100 |
| C     | 4.82446500 | 4.14873900  | 0.28234200  |
| H     | 3.18709300 | 2.88592000  | 0.83321500  |
| C     | 6.71134500 | 3.04610600  | -0.75195100 |
| C     | 6.09715400 | 4.21045400  | -0.29838200 |
| H     | 4.35117000 | 5.05033600  | 0.66223000  |
| H     | 7.71385000 | 3.09255100  | -1.17013300 |
| C     | 2.43400600 | 0.30662800  | 0.03939700  |
| C     | 1.67860700 | 1.24018900  | -0.71091100 |
| C     | 1.68967400 | -0.69837300 | 0.69688800  |
| C     | 0.29097900 | 1.20813100  | -0.76931400 |

|    |              |             |             |
|----|--------------|-------------|-------------|
| H  | 2.20440600   | 2.01351500  | -1.26350900 |
| C  | 0.29137300   | -0.73142100 | 0.65805200  |
| C  | -0.43214600  | 0.22725000  | -0.06296300 |
| H  | -0.24094400  | 1.96427800  | -1.34029200 |
| H  | -0.24253300  | -1.53513900 | 1.15856500  |
| C  | 4.80374600   | -0.95478200 | 0.22538700  |
| C  | 4.27344200   | -2.08258400 | 0.90425800  |
| C  | 6.11740700   | -1.10063300 | -0.29150200 |
| C  | 4.99770300   | -3.26861000 | 1.05925000  |
| C  | 6.84839600   | -2.28431000 | -0.14443800 |
| C  | 6.28480800   | -3.36432000 | 0.53236500  |
| H  | 4.55750800   | -4.11932000 | 1.57235800  |
| H  | 7.85773500   | -2.36031300 | -0.53977600 |
| H  | 6.85076500   | -4.28509300 | 0.64932200  |
| H  | 6.62061400   | 5.16017300  | -0.37648900 |
| C  | -1.91567300  | 0.19411400  | -0.09148600 |
| C  | -2.65435700  | -0.12032800 | 1.06313000  |
| C  | -2.62696400  | 0.48168900  | -1.26992500 |
| C  | -4.04753700  | -0.15750900 | 1.04162900  |
| H  | -2.13341400  | -0.32672500 | 1.99411200  |
| C  | -4.02030300  | 0.46056800  | -1.29561600 |
| H  | -2.08406700  | 0.71113200  | -2.18269500 |
| C  | -4.74133700  | 0.13698700  | -0.13900800 |
| H  | -4.60277200  | -0.41416600 | 1.93914300  |
| H  | -4.55497900  | 0.69574200  | -2.21132500 |
| C  | -6.95047000  | -0.69560300 | -0.99513200 |
| C  | -7.01042000  | 0.87837900  | 0.64065800  |
| C  | -6.55732900  | -1.64837000 | -1.94099800 |
| C  | -8.31926200  | -0.43873100 | -0.72190400 |
| C  | -6.68892600  | 1.84582200  | 1.59862300  |
| C  | -8.35752600  | 0.56602600  | 0.32122500  |
| C  | -7.56020500  | -2.33306800 | -2.62788300 |
| H  | -5.50922700  | -1.85561700 | -2.13344800 |
| C  | -9.30681100  | -1.14021500 | -1.42602700 |
| C  | -7.74169200  | 2.48838900  | 2.25071000  |
| H  | -5.65726300  | 2.09530200  | 1.82652300  |
| C  | -9.39623300  | 1.22607200  | 0.99092500  |
| C  | -8.92255700  | -2.08197200 | -2.37891500 |
| H  | -7.28005800  | -3.07775600 | -3.36846400 |
| H  | -10.35986500 | -0.95513200 | -1.22858600 |
| C  | -9.08339500  | 2.18206700  | 1.95571700  |
| H  | -7.51756700  | 3.24324500  | 3.00003300  |
| H  | -10.43352600 | 0.99821000  | 0.75799300  |
| H  | -9.67936000  | -2.63148700 | -2.93206100 |
| H  | -9.88039400  | 2.69969800  | 2.48254100  |
| N  | -6.16199600  | 0.10807000  | -0.16326400 |
| B  | 3.99294600   | 0.36027500  | 0.05458900  |
| Se | 2.53915100   | -2.07327200 | 1.71527700  |
| Se | 6.99468200   | 0.28400400  | -1.27754100 |

---

## Molecule-4

| Atoms | x           | y           | z           |
|-------|-------------|-------------|-------------|
| C     | -4.18768200 | 1.79149600  | -0.34873200 |
| C     | -3.57065400 | 2.75080600  | -1.19102000 |
| C     | -5.41370700 | 2.17066300  | 0.24680300  |
| C     | -4.11923100 | 4.01156900  | -1.41467800 |
| H     | -2.63832600 | 2.48912600  | -1.68361800 |
| C     | -5.95821500 | 3.44759900  | 0.05026800  |
| C     | -5.31247600 | 4.36679800  | -0.77729000 |
| H     | -3.61833900 | 4.71517800  | -2.07455700 |
| H     | -6.89997700 | 3.72253800  | 0.51962300  |
| C     | -1.95235400 | 0.30439600  | -0.19801500 |
| C     | -1.21891900 | 1.33989600  | 0.43265900  |
| C     | -1.18823500 | -0.76513700 | -0.71972300 |
| C     | 0.16836600  | 1.32959300  | 0.52374600  |
| H     | -1.76154400 | 2.17835600  | 0.86023400  |
| C     | 0.20954200  | -0.76918700 | -0.65709400 |
| C     | 0.91297400  | 0.27651000  | -0.03840300 |
| H     | 0.68116400  | 2.15982100  | 1.00192800  |
| H     | 0.76734600  | -1.61759100 | -1.04597100 |
| C     | -4.38678100 | -0.91667600 | -0.06311000 |
| C     | -3.96397500 | -2.16835300 | -0.59104900 |
| C     | -5.64580900 | -0.91343300 | 0.59963200  |
| C     | -4.74489800 | -3.32422900 | -0.47690200 |
| C     | -6.41580100 | -2.07463000 | 0.73516300  |
| C     | -5.96754900 | -3.27723500 | 0.19129100  |
| H     | -4.39410300 | -4.26979300 | -0.88288400 |
| H     | -7.37822000 | -2.04261900 | 1.23984600  |
| H     | -6.57023100 | -4.17717700 | 0.28821000  |
| H     | -5.75001300 | 5.34957400  | -0.93599900 |
| C     | 2.39555400  | 0.25679600  | 0.03622200  |
| C     | 3.17196400  | -0.19660300 | -1.04553100 |
| C     | 3.06888400  | 0.69273100  | 1.19184700  |
| C     | 4.56411900  | -0.22224800 | -0.97584500 |
| H     | 2.68206500  | -0.52082500 | -1.95962200 |
| C     | 4.46104000  | 0.68403000  | 1.26370500  |
| H     | 2.49661000  | 1.03075000  | 2.05130100  |
| C     | 5.21940800  | 0.22227900  | 0.17989000  |
| H     | 5.14837100  | -0.58603100 | -1.81610300 |
| H     | 4.96571900  | 1.03473300  | 2.15927800  |
| C     | 7.40275900  | -0.48719100 | 1.19824300  |
| C     | 7.51000900  | 0.88127500  | -0.61091900 |
| C     | 6.98210000  | -1.32270800 | 2.23880200  |
| C     | 8.77909300  | -0.25446600 | 0.93998100  |
| C     | 7.21581400  | 1.72468000  | -1.68789900 |
| C     | 8.84752900  | 0.61935000  | -0.21385000 |
| C     | 7.96478400  | -1.91303800 | 3.03449800  |
| H     | 5.92899300  | -1.51282900 | 2.42127700  |
| C     | 9.74592200  | -0.85944600 | 1.75433100  |

|    |             |             |             |
|----|-------------|-------------|-------------|
| C  | 8.28695000  | 2.29321900  | -2.37838100 |
| H  | 6.19110500  | 1.93696500  | -1.97668700 |
| C  | 9.90511700  | 1.20276700  | -0.92452900 |
| C  | 9.33398900  | -1.68343900 | 2.80069600  |
| H  | 7.66343300  | -2.56569100 | 3.84979500  |
| H  | 10.80417800 | -0.69140600 | 1.57007000  |
| C  | 9.61989800  | 2.03455100  | -2.00635700 |
| H  | 8.08443800  | 2.95142900  | -3.21936300 |
| H  | 10.93520600 | 1.01228300  | -0.63344200 |
| H  | 10.07426700 | -2.15725300 | 3.43956900  |
| H  | 10.43150800 | 2.49183800  | -2.56569100 |
| N  | 6.63892600  | 0.20581000  | 0.25178600  |
| B  | -3.51794100 | 0.38068700  | -0.20253400 |
| Te | -6.45530300 | 0.82973300  | 1.51184000  |
| Te | -2.14169000 | -2.40268300 | -1.66468100 |

Molecule-5

| Atoms | x           | y           | z           |
|-------|-------------|-------------|-------------|
| C     | -5.23866300 | -1.62789900 | 0.29524700  |
| C     | -4.94967100 | -2.73986400 | 1.11568400  |
| C     | -6.52743500 | -1.59051500 | -0.28253600 |
| C     | -5.89219100 | -3.74324300 | 1.34740200  |
| H     | -3.98087100 | -2.79734100 | 1.60510600  |
| C     | -7.47733500 | -2.58763300 | -0.07701400 |
| C     | -7.15656400 | -3.66445500 | 0.75585400  |
| H     | -5.64464000 | -4.58142200 | 1.99333900  |
| H     | -8.45592200 | -2.50556400 | -0.54170000 |
| C     | -2.73546700 | -0.45271700 | 0.31994900  |
| C     | -1.97153500 | -1.56768500 | -0.08732700 |
| C     | -1.99899900 | 0.70002200  | 0.67196500  |
| C     | -0.58074300 | -1.52567800 | -0.14680600 |
| H     | -2.48336700 | -2.47851900 | -0.38708000 |
| C     | -0.61244300 | 0.75973400  | 0.62996100  |
| C     | 0.12680300  | -0.35963000 | 0.20158900  |
| H     | -0.03405200 | -2.41403500 | -0.45040400 |
| H     | -0.11654100 | 1.69303100  | 0.88147400  |
| C     | -4.93116400 | 0.98812600  | -0.06801200 |
| C     | -4.31627700 | 2.18607800  | 0.34419000  |
| C     | -6.16607000 | 1.12252800  | -0.73077800 |
| C     | -4.88375200 | 3.43988300  | 0.12455000  |
| C     | -6.75923800 | 2.35990900  | -0.97636900 |
| C     | -6.11070600 | 3.51977200  | -0.54163400 |
| H     | -4.36464300 | 4.33463500  | 0.45603700  |
| H     | -7.71816300 | 2.40878200  | -1.48432500 |
| S     | -6.94875600 | -0.32348300 | -1.52076200 |
| S     | -2.83810300 | 2.13766700  | 1.41167400  |
| H     | -6.56352200 | 4.49095100  | -0.72287400 |
| H     | -7.89673800 | -4.43788200 | 0.94408400  |
| O     | -2.00399300 | 3.38180400  | 1.16556800  |

|   |             |             |             |
|---|-------------|-------------|-------------|
| O | -8.45340900 | -0.12541800 | -1.53859400 |
| C | 1.60628800  | -0.30543100 | 0.12015000  |
| C | 2.35890400  | 0.42227600  | 1.05991300  |
| C | 2.30230500  | -0.97895300 | -0.90023000 |
| C | 3.74948800  | 0.46558200  | 0.99324500  |
| H | 1.85514000  | 0.93084400  | 1.87706700  |
| C | 3.69157900  | -0.92345100 | -0.98514100 |
| H | 1.74955200  | -1.51820200 | -1.66452000 |
| C | 4.42806900  | -0.20419800 | -0.03403300 |
| H | 4.31594000  | 1.00440600  | 1.74685800  |
| H | 4.20993600  | -1.41950300 | -1.80030300 |
| C | 6.70399800  | -1.25861600 | -0.13220100 |
| C | 6.61951900  | 1.01228700  | -0.17757400 |
| C | 6.40168300  | -2.62190900 | -0.04999900 |
| C | 8.04364700  | -0.79790300 | -0.21171200 |
| C | 6.21212700  | 2.34972200  | -0.22200900 |
| C | 7.98959000  | 0.64973600  | -0.24173900 |
| C | 7.46479300  | -3.52539400 | -0.06917300 |
| H | 5.37719600  | -2.97092900 | 0.03292600  |
| C | 9.09311700  | -1.72575300 | -0.22929000 |
| C | 7.20339700  | 3.32745000  | -0.31153400 |
| H | 5.16229500  | 2.62414300  | -0.19486800 |
| C | 8.96551200  | 1.65092300  | -0.33146400 |
| C | 8.79849100  | -3.08639300 | -0.16233400 |
| H | 7.25493500  | -4.59011700 | -0.00754200 |
| H | 10.12486600 | -1.38831500 | -0.28978600 |
| C | 8.56776200  | 2.98628800  | -0.36150500 |
| H | 6.91162300  | 4.37385800  | -0.34624700 |
| H | 10.01955400 | 1.38911700  | -0.38146100 |
| H | 9.60392000  | -3.81557000 | -0.17638900 |
| H | 9.31524900  | 3.77191900  | -0.42956300 |
| N | 5.84351200  | -0.15301400 | -0.11158300 |
| B | -4.28205400 | -0.40583500 | 0.19103200  |

Molecule-6

| Atoms | x           | y           | z           |
|-------|-------------|-------------|-------------|
| C     | -4.95446800 | -1.64701200 | 0.44171100  |
| C     | -4.59498500 | -2.69349500 | 1.31392200  |
| C     | -6.25554000 | -1.70653600 | -0.10443200 |
| C     | -5.47951800 | -3.73459700 | 1.61057200  |
| H     | -3.61892900 | -2.67360700 | 1.79068600  |
| C     | -7.15061600 | -2.73435100 | 0.17027200  |
| C     | -6.75298200 | -3.75765400 | 1.03881700  |
| H     | -5.17598700 | -4.52318300 | 2.29380800  |
| H     | -8.14104600 | -2.72855400 | -0.27436500 |
| C     | -2.48851500 | -0.42793600 | 0.28602000  |
| C     | -1.73052200 | -1.55816500 | -0.07985200 |
| C     | -1.74595400 | 0.73887100  | 0.57117400  |
| C     | -0.33829100 | -1.52126400 | -0.14520600 |



|   |             |             |             |
|---|-------------|-------------|-------------|
| H | -2.24462800 | -2.47947700 | -0.33937100 |
| C | -0.36187900 | 0.79840300  | 0.51644500  |
| C | 0.37512900  | -0.34673900 | 0.15166700  |
| H | 0.20384600  | -2.42361500 | -0.41334900 |
| H | 0.14095900  | 1.73906700  | 0.71803600  |
| C | -4.73671300 | 0.96707300  | -0.09436700 |
| C | -4.14305500 | 2.19960700  | 0.22804300  |
| C | -5.99253000 | 1.04018600  | -0.72115700 |
| C | -4.74263600 | 3.42719700  | -0.04697000 |
| C | -6.62909500 | 2.24612700  | -1.00910400 |
| C | -5.99481700 | 3.44382700  | -0.66777900 |
| H | -4.23571500 | 4.35048100  | 0.21615700  |
| H | -7.60365700 | 2.24490600  | -1.48756300 |
| S | -6.75516900 | -0.47991600 | -1.32829800 |
| S | -2.60551600 | 2.20670400  | 1.17396000  |
| O | -1.83029300 | 3.40423600  | 0.80431500  |
| O | -2.95278400 | 1.97349400  | 2.58910200  |
| O | -6.10031600 | -0.82166400 | -2.60582100 |
| O | -8.21956600 | -0.32313500 | -1.28085900 |
| C | 1.85437400  | -0.30225000 | 0.07768000  |
| C | 2.60280500  | 0.46243700  | 0.99112500  |
| C | 2.55390500  | -1.02249200 | -0.90781500 |
| C | 3.99381700  | 0.49705600  | 0.93258500  |
| H | 2.09602300  | 1.00516600  | 1.78425400  |
| C | 3.94360700  | -0.97550200 | -0.98528700 |
| H | 2.00443000  | -1.59136700 | -1.65281000 |
| C | 4.67695800  | -0.21865600 | -0.06058700 |
| H | 4.55693100  | 1.06373900  | 1.66787800  |
| H | 4.46498600  | -1.50695800 | -1.77567400 |
| C | 6.94761400  | -1.28650800 | -0.12053500 |
| C | 6.87446500  | 0.98408200  | -0.22084400 |
| C | 6.63922600  | -2.64595400 | -0.00494500 |
| C | 8.28944600  | -0.83379000 | -0.20449100 |
| C | 6.47477900  | 2.32209300  | -0.30134500 |
| C | 8.24264600  | 0.61300600  | -0.26975000 |
| C | 7.69855600  | -3.55412000 | 0.00370700  |
| H | 5.61328200  | -2.98924300 | 0.08302100  |
| C | 9.33508300  | -1.76594100 | -0.19366300 |
| C | 7.47179200  | 3.29207200  | -0.41041100 |
| H | 5.42657400  | 2.60343500  | -0.28720400 |
| C | 9.22450500  | 1.60621300  | -0.37972900 |
| C | 9.03440000  | -3.12324400 | -0.09430000 |
| H | 7.48372700  | -4.61598200 | 0.09143900  |
| H | 10.36847900 | -1.43424700 | -0.25713100 |
| C | 8.83435300  | 2.94255800  | -0.44488700 |
| H | 7.18579200  | 4.33875500  | -0.47295100 |
| H | 10.27723000 | 1.33742500  | -0.41836400 |
| H | 9.83674400  | -3.85585700 | -0.08621400 |
| H | 9.58646500  | 3.72218000  | -0.52877400 |
| N | 6.09188100  | -0.17608000 | -0.13063200 |

|   |             |             |             |
|---|-------------|-------------|-------------|
| H | -7.44342800 | -4.56368500 | 1.27178400  |
| H | -6.47678200 | 4.39227500  | -0.88689800 |
| B | -4.04118400 | -0.40375400 | 0.21916300  |

Molecule-7

| Atoms | x           | y           | z           |
|-------|-------------|-------------|-------------|
| C     | -4.66148200 | -1.67785700 | 0.60201300  |
| C     | -4.35062000 | -2.57388000 | 1.64843400  |
| C     | -5.92020100 | -1.83875100 | -0.01141700 |
| C     | -5.25641100 | -3.55469600 | 2.05921400  |
| H     | -3.39633600 | -2.48045700 | 2.16086400  |
| C     | -6.83348600 | -2.81195600 | 0.37509900  |
| C     | -6.50046200 | -3.66767300 | 1.43163600  |
| H     | -4.99639000 | -4.22427100 | 2.87486000  |
| H     | -7.79949700 | -2.87923200 | -0.11895800 |
| C     | -2.19977000 | -0.46832000 | 0.42635000  |
| C     | -1.45117900 | -1.60795500 | 0.05892300  |
| C     | -1.45189900 | 0.69355900  | 0.70322700  |
| C     | -0.06116000 | -1.57361700 | -0.03115900 |
| H     | -1.97230900 | -2.53370600 | -0.17242900 |
| C     | -0.06884600 | 0.74777300  | 0.63229900  |
| C     | 0.65809900  | -0.39465400 | 0.24132000  |
| H     | 0.47678100  | -2.47880000 | -0.29881300 |
| H     | 0.43788700  | 1.69018900  | 0.82402700  |
| C     | -4.44015200 | 0.89116100  | -0.12864800 |
| C     | -3.91462300 | 2.15077300  | 0.21317700  |
| C     | -5.62410500 | 0.90872400  | -0.88870900 |
| C     | -4.51606600 | 3.34958600  | -0.15902800 |
| C     | -6.25265900 | 2.08587800  | -1.28468200 |
| C     | -5.69262000 | 3.31280500  | -0.91437400 |
| H     | -4.05864500 | 4.29651700  | 0.11546900  |
| H     | -7.17813000 | 2.04380500  | -1.85309100 |
| H     | -6.17321000 | 4.24043200  | -1.21423900 |
| H     | -7.21262100 | -4.41975100 | 1.76150200  |
| O     | -1.47928200 | 3.60211600  | 0.92744200  |
| O     | -8.02634300 | -0.59588600 | -1.60115800 |
| C     | 2.13583300  | -0.35477900 | 0.13338200  |
| C     | 2.90775800  | 0.40971100  | 1.02712200  |
| C     | 2.81108300  | -1.08008900 | -0.86513700 |
| C     | 4.29732500  | 0.43938400  | 0.93742900  |
| H     | 2.42021200  | 0.95907300  | 1.82752400  |
| C     | 4.19908800  | -1.03868100 | -0.97385300 |
| H     | 2.24261800  | -1.64973500 | -1.59512000 |
| C     | 4.95522400  | -0.28186500 | -0.06830400 |
| H     | 4.87910800  | 1.00798600  | 1.65667600  |
| H     | 4.70125200  | -1.57528800 | -1.77328500 |
| C     | 7.22206200  | -1.35616700 | -0.15882600 |
| C     | 7.15177200  | 0.91159700  | -0.29813300 |
| C     | 6.91245500  | -2.71260500 | -0.01407400 |

|    |             |             |             |
|----|-------------|-------------|-------------|
| C  | 8.56309600  | -0.90885400 | -0.27999000 |
| C  | 6.75254300  | 2.24889200  | -0.39256500 |
| C  | 8.51805800  | 0.53663100  | -0.36983300 |
| C  | 7.96926600  | -3.62367800 | -0.01283500 |
| H  | 5.88736400  | -3.05061500 | 0.10074700  |
| C  | 9.60612400  | -1.84405200 | -0.27583300 |
| C  | 7.74863800  | 3.21462800  | -0.54004200 |
| H  | 5.70521800  | 2.53213500  | -0.36002400 |
| C  | 9.49896100  | 1.52587100  | -0.51835000 |
| C  | 9.30396400  | -3.19854800 | -0.14673300 |
| H  | 7.75362400  | -4.68333500 | 0.09715700  |
| H  | 10.63883400 | -1.51678500 | -0.36763300 |
| C  | 9.10964900  | 2.86166000  | -0.59825700 |
| H  | 7.46320500  | 4.26070800  | -0.61439800 |
| H  | 10.55020900 | 1.25439000  | -0.57504700 |
| H  | 10.10433200 | -3.93339800 | -0.14350200 |
| H  | 9.86105100  | 3.63818700  | -0.71215800 |
| N  | 6.36928800  | -0.24436500 | -0.17013400 |
| B  | -3.75031700 | -0.44795100 | 0.30768300  |
| Se | -2.36641000 | 2.27511000  | 1.42260800  |
| Se | -6.36519400 | -0.77267800 | -1.59704700 |

Molecule-8

| Atoms | x           | y           | z           |
|-------|-------------|-------------|-------------|
| C     | 6.60583300  | 1.28119500  | -0.49246300 |
| C     | 6.42610300  | 2.59704000  | -0.98741500 |
| C     | 7.95193400  | 0.86606200  | -0.34557000 |
| C     | 7.48862700  | 3.42951200  | -1.31336600 |
| H     | 5.41985000  | 2.97779900  | -1.11697500 |
| C     | 9.03964900  | 1.68993900  | -0.67059200 |
| C     | 8.80545700  | 2.96915300  | -1.15410200 |
| H     | 7.30178800  | 4.43179300  | -1.68923600 |
| H     | 10.04662500 | 1.30713000  | -0.53461000 |
| C     | 3.94785600  | 0.34210700  | -0.13225500 |
| C     | 3.14475400  | 1.41890200  | -0.58167300 |
| C     | 3.22673300  | -0.78459800 | 0.33076100  |
| C     | 1.75902400  | 1.38468500  | -0.57150800 |
| H     | 3.62519900  | 2.31876600  | -0.94723000 |
| C     | 1.82746700  | -0.83743000 | 0.35194400  |
| C     | 1.07138500  | 0.24558600  | -0.09763600 |
| H     | 1.19758700  | 2.25281700  | -0.90481200 |
| H     | 1.35241400  | -1.75024100 | 0.69782600  |
| C     | 6.03552100  | -1.06091100 | 0.42250800  |
| C     | 5.17458700  | -2.09388900 | 0.84014400  |
| C     | 7.41791300  | -1.31452200 | 0.50786400  |
| C     | 5.64649700  | -3.31603800 | 1.31854200  |
| C     | 7.93049100  | -2.52360700 | 0.97919000  |
| C     | 7.02893800  | -3.51282700 | 1.38041800  |
| H     | 4.94681700  | -4.08469600 | 1.63011300  |

|   |             |             |             |
|---|-------------|-------------|-------------|
| H | 9.00364200  | -2.67669800 | 1.02772500  |
| H | 7.41253700  | -4.46004000 | 1.75031200  |
| H | 9.64509000  | 3.61162000  | -1.40669700 |
| C | -0.41325900 | 0.19886300  | -0.07856600 |
| C | -1.10628200 | -0.41247200 | 0.98176200  |
| C | -1.16700000 | 0.76652200  | -1.12165900 |
| C | -2.50021100 | -0.45570500 | 0.99924500  |
| H | -0.55010700 | -0.83576200 | 1.81368100  |
| C | -2.56096600 | 0.72308300  | -1.10724100 |
| H | -0.65801600 | 1.22371500  | -1.96571600 |
| C | -3.23580400 | 0.11196900  | -0.04585000 |
| H | -3.02639900 | -0.92179400 | 1.82787700  |
| H | -3.13395200 | 1.15579100  | -1.92283000 |
| C | -5.38204400 | 1.12357500  | 0.57570400  |
| C | -5.33267100 | -1.02333500 | -0.62153000 |
| C | -4.67943800 | 2.19868300  | 1.16041800  |
| C | -6.79337800 | 1.11835600  | 0.60510200  |
| C | -6.74247000 | -1.09519000 | -0.62901300 |
| C | -4.58145300 | -2.05954600 | -1.21588100 |
| C | -5.35496800 | 3.25393600  | 1.76492600  |
| H | -3.59626800 | 2.20662400  | 1.14119100  |
| C | -7.44077300 | 2.19853900  | 1.22237000  |
| C | -7.63216100 | -0.01166000 | -0.00589300 |
| C | -7.33934700 | -2.20986600 | -1.23578300 |
| H | -3.49928100 | -2.00865000 | -1.21281500 |
| C | -5.20758400 | -3.15100700 | -1.80917700 |
| C | -6.74991400 | 3.26223200  | 1.80059100  |
| H | -4.78464800 | 4.06714300  | 2.20684700  |
| H | -8.52672500 | 2.20971000  | 1.25297500  |
| C | -6.60039600 | -3.23518700 | -1.82375500 |
| H | -8.42341900 | -2.28018200 | -1.25006100 |
| H | -4.60057000 | -3.93282600 | -2.25877300 |
| H | -7.29235900 | 4.07887800  | 2.26874700  |
| H | -7.10458400 | -4.08084400 | -2.28308400 |
| N | -4.67091400 | 0.06922400  | -0.02881900 |
| C | -8.55731400 | 0.58026100  | -1.10585400 |
| H | -7.96432300 | 1.03858800  | -1.90476200 |
| H | -9.18627700 | -0.19711600 | -1.55285600 |
| H | -9.22101300 | 1.34732600  | -0.69251000 |
| C | -8.50866800 | -0.65195500 | 1.10678700  |
| H | -9.13603900 | -1.45365900 | 0.70261400  |
| H | -7.88081700 | -1.07745700 | 1.89715900  |
| H | -9.17215700 | 0.09069600  | 1.56278600  |
| B | 5.49832400  | 0.26652000  | -0.09804200 |
| O | 3.81860500  | -1.93481200 | 0.79349500  |
| O | 8.32566800  | -0.36997700 | 0.12476800  |

Molecule-9

| Atoms | x | y | z |
|-------|---|---|---|
|-------|---|---|---|

---

|   |             |             |             |
|---|-------------|-------------|-------------|
| C | 6.01683700  | 1.54465500  | -0.15879500 |
| C | 5.48513200  | 2.81979300  | 0.15872800  |
| C | 7.36585200  | 1.52049200  | -0.59098400 |
| C | 6.21126900  | 3.99479300  | 0.00196900  |
| H | 4.47742600  | 2.87778600  | 0.55857000  |
| C | 8.09962300  | 2.70521700  | -0.78138400 |
| C | 7.52076300  | 3.93594600  | -0.49422500 |
| H | 5.76699100  | 4.95133800  | 0.26421000  |
| H | 9.12990900  | 2.65527200  | -1.12534000 |
| C | 3.63588900  | 0.20478500  | -0.01050500 |
| C | 2.86752000  | 1.18384600  | -0.68713600 |
| C | 2.89849700  | -0.84486000 | 0.58932900  |
| C | 1.48021100  | 1.16455700  | -0.71693200 |
| H | 3.38489700  | 1.97915600  | -1.21472900 |
| C | 1.49486300  | -0.85768500 | 0.58901900  |
| C | 0.76473500  | 0.14826400  | -0.05177600 |
| H | 0.94213100  | 1.95403600  | -1.23432400 |
| H | 0.96901100  | -1.69142100 | 1.04738600  |
| C | 5.95105100  | -1.09641100 | 0.22333000  |
| C | 5.32806800  | -2.23420600 | 0.80554700  |
| C | 7.31132700  | -1.25314100 | -0.15952300 |
| C | 6.01497900  | -3.43914500 | 1.00093600  |
| C | 7.99828100  | -2.46155800 | 0.01736800  |
| C | 7.34569100  | -3.54534300 | 0.60080300  |
| H | 5.50792300  | -4.29188900 | 1.44428500  |
| H | 9.03953600  | -2.54696700 | -0.28152800 |
| H | 7.87874600  | -4.48156700 | 0.74514800  |
| H | 8.09836400  | 4.84675600  | -0.63084100 |
| C | -0.72038800 | 0.12448900  | -0.05414700 |
| C | -1.43935500 | -0.26633200 | 1.08990300  |
| C | -1.44881300 | 0.49258900  | -1.19979900 |
| C | -2.83389500 | -0.28889100 | 1.08971300  |
| H | -0.90280600 | -0.53014500 | 1.99728300  |
| C | -2.84331900 | 0.46924200  | -1.20289900 |
| H | -0.91974600 | 0.77436700  | -2.10600500 |
| C | -3.54404600 | 0.07840200  | -0.05754400 |
| H | -3.38019800 | -0.58327900 | 1.98169000  |
| H | -3.39682700 | 0.74558200  | -2.09621900 |
| C | -5.68611700 | 1.21200400  | 0.32062100  |
| C | -5.64645700 | -1.12557100 | -0.44064700 |
| C | -4.97858100 | 2.37401700  | 0.69544000  |
| C | -7.09768400 | 1.22435300  | 0.33210600  |
| C | -7.05673400 | -1.18588400 | -0.45196500 |
| C | -4.89977200 | -2.26226200 | -0.81703100 |
| C | -5.64945400 | 3.53205700  | 1.07520400  |
| H | -3.89524700 | 2.36898400  | 0.68909300  |
| C | -7.74026400 | 2.40896400  | 0.72026100  |
| C | -7.94164300 | 0.00406700  | -0.05847600 |
| C | -7.65867900 | -2.39130700 | -0.84127800 |
| H | -3.81723700 | -2.22044800 | -0.81083800 |

|   |             |             |             |
|---|-------------|-------------|-------------|
| C | -5.53084600 | -3.44203900 | -1.19808100 |
| C | -7.04453600 | 3.55874300  | 1.09046800  |
| H | -5.07546400 | 4.41072800  | 1.35866300  |
| H | -8.82629200 | 2.43481900  | 0.73457800  |
| C | -6.92421400 | -3.51621100 | -1.21303300 |
| H | -8.74319200 | -2.45432500 | -0.85498700 |
| H | -4.92728300 | -4.30028400 | -1.48262600 |
| H | -7.58340300 | 4.45506800  | 1.38465400  |
| H | -7.43226400 | -4.43010800 | -1.50798100 |
| N | -4.97966700 | 0.05470900  | -0.05926900 |
| C | -8.85171900 | 0.37976200  | -1.26133700 |
| H | -8.24760300 | 0.67112500  | -2.12742100 |
| H | -9.48396800 | -0.46444500 | -1.55669700 |
| H | -9.51194600 | 1.21693100  | -1.01049800 |
| C | -8.83345300 | -0.40333200 | 1.14776100  |
| H | -9.46463600 | -1.26326600 | 0.89916800  |
| H | -8.21622300 | -0.67333500 | 2.01151600  |
| H | -9.49380200 | 0.41822300  | 1.44558200  |
| B | 5.19299300  | 0.23391800  | 0.01679600  |
| S | 3.65783700  | -2.22609100 | 1.39552400  |
| S | 8.24792500  | 0.02719000  | -0.94533200 |

Molecule-10

| Atoms | x          | y           | z           |
|-------|------------|-------------|-------------|
| C     | 5.32007800 | 1.72348900  | 0.04782500  |
| C     | 4.74539500 | 2.88181500  | 0.62730900  |
| C     | 6.61961400 | 1.86883000  | -0.48881700 |
| C     | 5.39934600 | 4.11017900  | 0.64361700  |
| H     | 3.76376800 | 2.80297500  | 1.08571800  |
| C     | 7.28247000 | 3.10429700  | -0.49137600 |
| C     | 6.66990200 | 4.22356800  | 0.06603200  |
| H     | 4.92752200 | 4.97432100  | 1.10387500  |
| H     | 8.28352800 | 3.18796900  | -0.90721800 |
| C     | 3.00813500 | 0.30396300  | 0.07065000  |
| C     | 2.24986700 | 1.29912800  | -0.59242900 |
| C     | 2.26674100 | -0.75480800 | 0.64118400  |
| C     | 0.86194600 | 1.27155100  | -0.64799900 |
| H     | 2.77347900 | 2.11786300  | -1.07760400 |
| C     | 0.86818400 | -0.78411300 | 0.60661900  |
| C     | 0.14218200 | 0.23260500  | -0.02665400 |
| H     | 0.32734800 | 2.07342000  | -1.14989500 |
| H     | 0.33599400 | -1.62795900 | 1.03814800  |
| C     | 5.37865600 | -0.96791900 | 0.13512300  |
| C     | 4.85106400 | -2.15147500 | 0.71391000  |
| C     | 6.69013500 | -1.06704300 | -0.39816600 |
| C     | 5.57567300 | -3.34650300 | 0.75976100  |
| C     | 7.42148500 | -2.25898500 | -0.35974800 |
| C     | 6.86037700 | -3.39493800 | 0.22067200  |
| H     | 5.13749800 | -4.23948900 | 1.19718300  |

|    |              |             |             |
|----|--------------|-------------|-------------|
| H  | 8.42912200   | -2.29950500 | -0.76454200 |
| H  | 7.42650700   | -4.32244700 | 0.25280400  |
| H  | 7.19320300   | 5.17657100  | 0.07091600  |
| C  | -1.34188500  | 0.19974900  | -0.05410600 |
| C  | -2.07542200  | -0.21019700 | 1.07393900  |
| C  | -2.05446400  | 0.58076900  | -1.20530100 |
| C  | -3.46960100  | -0.23969200 | 1.05239100  |
| H  | -1.55073800  | -0.48390400 | 1.98532500  |
| C  | -3.44860500  | 0.54977600  | -1.22986900 |
| H  | -1.51259200  | 0.87833200  | -2.09886800 |
| C  | -4.16413000  | 0.13936400  | -0.10062700 |
| H  | -4.02795200  | -0.54889600 | 1.93180900  |
| H  | -3.99030600  | 0.83567700  | -2.12740800 |
| C  | -6.31762800  | 1.25768500  | 0.25655100  |
| C  | -6.25377500  | -1.07255100 | -0.52537800 |
| C  | -5.62205500  | 2.42044200  | 0.65091200  |
| C  | -7.72924400  | 1.26155600  | 0.24947100  |
| C  | -7.66337500  | -1.14127600 | -0.55550000 |
| C  | -5.49523900  | -2.20099000 | -0.90294800 |
| C  | -6.30482800  | 3.57108700  | 1.03191600  |
| H  | -4.53872000  | 2.42178100  | 0.65894800  |
| C  | -8.38400200  | 2.43888900  | 0.63942300  |
| C  | -8.56057300  | 0.03943500  | -0.16195400 |
| C  | -8.25281500  | -2.34656700 | -0.96388100 |
| H  | -4.41315000  | -2.15258000 | -0.88273400 |
| C  | -6.11408600  | -3.38079400 | -1.30346600 |
| C  | -7.70012700  | 3.58942700  | 1.02886500  |
| H  | -5.73994700  | 4.45058600  | 1.33070000  |
| H  | -9.47025900  | 2.45818100  | 0.63975200  |
| C  | -7.50666600  | -3.46335400 | -1.33684700 |
| H  | -9.33665700  | -2.41610900 | -0.99194700 |
| H  | -5.50163200  | -4.23251400 | -1.58861000 |
| H  | -8.24820500  | 4.47992800  | 1.32372000  |
| H  | -8.00520500  | -4.37747200 | -1.64694800 |
| N  | -5.59932800  | 0.10801400  | -0.12410800 |
| C  | -9.45900100  | 0.42003200  | -1.37198300 |
| H  | -8.84677500  | 0.72299000  | -2.22833600 |
| H  | -10.08231900 | -0.42547300 | -1.68220200 |
| H  | -10.12757000 | 1.25065700  | -1.12150400 |
| C  | -9.46366000  | -0.38448100 | 1.03011500  |
| H  | -10.08616400 | -1.24627300 | 0.76651700  |
| H  | -8.85474600  | -0.65817100 | 1.89860200  |
| H  | -10.13277400 | 0.43014400  | 1.32742700  |
| B  | 4.56725300   | 0.35669800  | 0.08417900  |
| Se | 3.12022700   | -2.21450400 | 1.52987500  |
| Se | 7.56348900   | 0.39974300  | -1.26138000 |

Molecule-11

| Atoms | x | y | z |
|-------|---|---|---|
|-------|---|---|---|

---

|   |             |             |             |
|---|-------------|-------------|-------------|
| C | 4.73428500  | 1.78640100  | 0.38266100  |
| C | 4.11936500  | 2.72349500  | 1.25109200  |
| C | 5.95525600  | 2.18370500  | -0.21144800 |
| C | 4.66538600  | 3.98042900  | 1.50115900  |
| H | 3.19102600  | 2.44715800  | 1.74321000  |
| C | 6.49694500  | 3.45739700  | 0.01189200  |
| C | 5.85339900  | 4.35463500  | 0.86492500  |
| H | 4.16635900  | 4.66654500  | 2.18058500  |
| H | 7.43485000  | 3.74655900  | -0.45661700 |
| C | 2.50266400  | 0.29616600  | 0.21008200  |
| C | 1.76216600  | 1.34400200  | -0.39114000 |
| C | 1.74534600  | -0.78791600 | 0.71109300  |
| C | 0.37428100  | 1.33121000  | -0.47371300 |
| H | 2.29938700  | 2.19408600  | -0.80223600 |
| C | 0.34716300  | -0.79514000 | 0.65702700  |
| C | -0.36318500 | 0.26266300  | 0.06783300  |
| H | -0.14432000 | 2.17064500  | -0.92899200 |
| H | -0.20568700 | -1.65404600 | 1.02951000  |
| C | 4.93999500  | -0.91334600 | 0.03120700  |
| C | 4.52441300  | -2.17847600 | 0.53215400  |
| C | 6.19503100  | -0.89027200 | -0.63867200 |
| C | 5.30833500  | -3.32874100 | 0.38615900  |
| C | 6.96781300  | -2.04541900 | -0.80625800 |
| C | 6.52671400  | -3.26194700 | -0.28811500 |
| H | 4.96311900  | -4.28474800 | 0.77194300  |
| H | 7.92699800  | -1.99835900 | -1.31587900 |
| H | 7.13165700  | -4.15735100 | -0.40985500 |
| H | 6.28878800  | 5.33484100  | 1.04411100  |
| C | -1.84668200 | 0.24020300  | 0.00283000  |
| C | -2.61248200 | -0.24187700 | 1.08023300  |
| C | -2.52758500 | 0.70211100  | -1.13861000 |
| C | -4.00604000 | -0.26181300 | 1.02008000  |
| H | -2.11421400 | -0.57974800 | 1.98485500  |
| C | -3.92096800 | 0.68240400  | -1.20154300 |
| H | -1.96096800 | 1.05598700  | -1.99548400 |
| C | -4.66832300 | 0.20023300  | -0.12194700 |
| H | -4.58868900 | -0.62727400 | 1.86132300  |
| H | -4.43721400 | 1.03250300  | -2.09129600 |
| C | -6.82564300 | 1.30201900  | 0.26302700  |
| C | -6.75140200 | -0.96152100 | -0.69428900 |
| C | -6.13557700 | 2.42510600  | 0.76774200  |
| C | -8.23659800 | 1.31766700  | 0.21454000  |
| C | -8.16001100 | -1.01619800 | -0.77213200 |
| C | -5.98814700 | -2.06479800 | -1.13288500 |
| C | -6.82323600 | 3.54800300  | 1.21771400  |
| H | -5.05298300 | 2.41751200  | 0.80743300  |
| C | -8.89644600 | 2.46617300  | 0.67630900  |
| C | -9.06187900 | 0.13913600  | -0.31841500 |
| C | -8.74396500 | -2.18228800 | -1.28882500 |
| H | -4.90696200 | -2.02725900 | -1.07572400 |



|    |              |             |             |
|----|--------------|-------------|-------------|
| C  | -6.60149300  | -3.20601200 | -1.64051400 |
| C  | -8.21805800  | 3.57748200  | 1.17513100  |
| H  | -6.26273900  | 4.39703300  | 1.60088400  |
| H  | -9.98205900  | 2.49419500  | 0.64550800  |
| C  | -7.99319100  | -3.27408200 | -1.72278400 |
| H  | -9.82679800  | -2.24030100 | -1.35527000 |
| H  | -5.98567800  | -4.03890000 | -1.97044200 |
| H  | -8.76976100  | 4.44649500  | 1.52257800  |
| H  | -8.48735400  | -4.15781400 | -2.11660700 |
| N  | -6.10258300  | 0.18003100  | -0.18534300 |
| C  | -9.91489800  | 0.62119800  | -1.52543100 |
| H  | -9.27088400  | 0.98409100  | -2.33391500 |
| H  | -10.53243100 | -0.19195700 | -1.92200300 |
| H  | -10.58618300 | 1.43620200  | -1.23397400 |
| C  | -10.00897800 | -0.36715800 | 0.80560200  |
| H  | -10.62861800 | -1.19935900 | 0.45442000  |
| H  | -9.43258600  | -0.71395000 | 1.67025200  |
| H  | -10.68191300 | 0.42856700  | 1.14294000  |
| B  | 4.06810200   | 0.37747500  | 0.20686400  |
| Te | 2.70963500   | -2.44424300 | 1.61102500  |
| Te | 6.99326500   | 0.87659000  | -1.51430900 |

Molecule-12

| Atoms | x          | y           | z           |
|-------|------------|-------------|-------------|
| C     | 5.81902900 | 1.65710600  | -0.13663500 |
| C     | 5.52690500 | 2.94338400  | 0.36660200  |
| C     | 7.10732900 | 1.47452700  | -0.68732500 |
| C     | 6.46612300 | 3.97543300  | 0.32730100  |
| H     | 4.55843700 | 3.12324800  | 0.82606300  |
| C     | 8.05386100 | 2.49376400  | -0.75021800 |
| C     | 7.73015500 | 3.74925300  | -0.22571000 |
| H     | 6.21629500 | 4.95213500  | 0.73311200  |
| H     | 9.03222200 | 2.29669700  | -1.17948600 |
| C     | 3.31984200 | 0.52157600  | 0.19899500  |
| C     | 2.55221700 | 1.49016500  | -0.48273500 |
| C     | 2.58816700 | -0.50148700 | 0.84144200  |
| C     | 1.16124400 | 1.43069000  | -0.52546900 |
| H     | 3.06083700 | 2.29217400  | -1.01139400 |
| C     | 1.20136300 | -0.57261600 | 0.82125200  |
| C     | 0.45889500 | 0.39470200  | 0.11788100  |
| H     | 0.61058600 | 2.20657200  | -1.04996000 |
| H     | 0.70764000 | -1.40789500 | 1.31004900  |
| C     | 5.52014400 | -0.96426500 | 0.19342000  |
| C     | 4.90988000 | -2.01535000 | 0.90466400  |
| C     | 6.75486300 | -1.26268400 | -0.41387900 |
| C     | 5.48152200 | -3.28134000 | 1.01786200  |
| C     | 7.35206000 | -2.51946500 | -0.32999700 |

|   |             |             |             |
|---|-------------|-------------|-------------|
| C | 6.70798300  | -3.52813900 | 0.39297200  |
| H | 4.96600400  | -4.06051300 | 1.57199800  |
| H | 8.31063900  | -2.69591200 | -0.80951700 |
| H | 7.16397700  | -4.51160700 | 0.46998000  |
| H | 8.46782400  | 4.54729700  | -0.24671500 |
| C | -1.02218900 | 0.31840900  | 0.05796500  |
| C | -1.76955700 | -0.11613100 | 1.16777000  |
| C | -1.71760800 | 0.67798900  | -1.11094000 |
| C | -3.16117400 | -0.18341400 | 1.11313800  |
| H | -1.26129900 | -0.38131100 | 2.09060700  |
| C | -3.10893700 | 0.60720000  | -1.16851100 |
| H | -1.16504200 | 0.98785800  | -1.99365000 |
| C | -3.83905300 | 0.17770900  | -0.05563800 |
| H | -3.73059000 | -0.51105600 | 1.97847100  |
| H | -3.63698400 | 0.87602600  | -2.07921800 |
| C | -6.02915400 | 1.23822500  | 0.24554600  |
| C | -5.88314600 | -1.09144000 | -0.53108800 |
| C | -5.37548600 | 2.41875900  | 0.65815300  |
| C | -7.43955600 | 1.20506900  | 0.19858000  |
| C | -7.28888100 | -1.19602200 | -0.60056700 |
| C | -5.08516700 | -2.19993800 | -0.88468000 |
| C | -6.09845200 | 3.55161000  | 1.01807300  |
| H | -4.29320100 | 2.44856000  | 0.69781600  |
| C | -8.13535300 | 2.36528600  | 0.56815300  |
| C | -8.22698500 | -0.03861100 | -0.23405300 |
| C | -7.83524000 | -2.41664100 | -1.02321500 |
| H | -4.00559700 | -2.12498600 | -0.83286400 |
| C | -5.66175000 | -3.39602500 | -1.29989200 |
| C | -7.49299900 | 3.53356000  | 0.97513700  |
| H | -5.56545400 | 4.44559300  | 1.33203600  |
| H | -9.22128600 | 2.35626800  | 0.53763600  |
| C | -7.05017400 | -3.51413100 | -1.37268400 |
| H | -8.91567800 | -2.51431700 | -1.08151500 |
| H | -5.01971500 | -4.23231100 | -1.56458700 |
| H | -8.07224500 | 4.40960300  | 1.25313000  |
| H | -7.51598100 | -4.44134500 | -1.69445100 |
| N | -5.27106800 | 0.10695800  | -0.11333700 |
| C | -9.10086200 | 0.31771500  | -1.46914500 |
| H | -8.47325000 | 0.63606100  | -2.30862100 |
| H | -9.69292300 | -0.54400000 | -1.79540100 |
| H | -9.79771000 | 1.13063900  | -1.23841200 |
| C | -9.15150600 | -0.48477100 | 0.93317600  |
| H | -9.74411100 | -1.36239600 | 0.65355200  |
| H | -8.56017200 | -0.74224800 | 1.81857900  |
| H | -9.84932900 | 0.31255900  | 1.21064700  |
| B | 4.86683000  | 0.44712800  | 0.08266400  |
| S | 3.43335400  | -1.69553800 | 1.92681500  |
| S | 7.53164600  | -0.06956700 | -1.55421500 |
| O | 2.60303700  | -2.96316800 | 2.01392100  |

---

## Molecule-13

| Atoms | x           | y           | z           |
|-------|-------------|-------------|-------------|
| C     | 5.52493600  | 1.71218300  | -0.03624000 |
| C     | 5.16390800  | 2.96030100  | 0.50863300  |
| C     | 6.82443300  | 1.61938000  | -0.58155200 |
| C     | 6.04569800  | 4.04505600  | 0.49851600  |
| H     | 4.18910400  | 3.07242800  | 0.97506100  |
| C     | 7.71658600  | 2.68530500  | -0.60924800 |
| C     | 7.31763400  | 3.91004800  | -0.06099400 |
| H     | 5.74117300  | 4.99287900  | 0.93405200  |
| H     | 8.70585700  | 2.55764800  | -1.03788600 |
| C     | 3.06241300  | 0.49170300  | 0.16357600  |
| C     | 2.30032600  | 1.47145300  | -0.50309400 |
| C     | 2.32521600  | -0.55010800 | 0.76758400  |
| C     | 0.90785100  | 1.41322600  | -0.55180100 |
| H     | 2.81072700  | 2.28386500  | -1.01290800 |
| C     | 0.94092600  | -0.62638200 | 0.73626200  |
| C     | 0.20034600  | 0.36775600  | 0.06591200  |
| H     | 0.36118800  | 2.20092900  | -1.06250600 |
| H     | 0.44087100  | -1.47258600 | 1.19711900  |
| C     | 5.31501400  | -0.94796600 | 0.18209400  |
| C     | 4.72647400  | -2.04181100 | 0.83980100  |
| C     | 6.56944800  | -1.19069000 | -0.40332400 |
| C     | 5.32961800  | -3.29567100 | 0.91837000  |
| C     | 7.20944700  | -2.42727600 | -0.34332600 |
| C     | 6.58016800  | -3.48263600 | 0.32270800  |
| H     | 4.82666700  | -4.10921200 | 1.43204700  |
| H     | 8.18281100  | -2.55786700 | -0.80615700 |
| H     | 7.06485100  | -4.45319100 | 0.37698200  |
| H     | 8.00589700  | 4.75084500  | -0.06571700 |
| C     | -1.28077100 | 0.30077300  | 0.01168200  |
| C     | -2.02327400 | -0.15239200 | 1.11725500  |
| C     | -1.97950700 | 0.68885900  | -1.14599000 |
| C     | -3.41551300 | -0.21049700 | 1.06892600  |
| H     | -1.51159200 | -0.43683600 | 2.03256800  |
| C     | -3.37137700 | 0.62667300  | -1.19677500 |
| H     | -1.43017200 | 1.01351300  | -2.02544400 |
| C     | -4.09757700 | 0.17821700  | -0.08860100 |
| H     | -3.98211000 | -0.55176200 | 1.93075200  |
| H     | -3.90314200 | 0.91695300  | -2.09860800 |
| C     | -6.27945100 | 1.24349600  | 0.25056900  |
| C     | -6.15082800 | -1.06886100 | -0.58118700 |
| C     | -5.61672400 | 2.41050600  | 0.68615300  |
| C     | -7.69013500 | 1.21850800  | 0.21190100  |
| C     | -7.55746400 | -1.16415900 | -0.64388200 |
| C     | -5.36114800 | -2.17299200 | -0.96548400 |
| C     | -6.33126700 | 3.53836200  | 1.07736000  |
| H     | -4.53404900 | 2.43410500  | 0.71956500  |

|   |              |             |             |
|---|--------------|-------------|-------------|
| C | -8.37729600  | 2.37332000  | 0.61321600  |
| C | -8.48689800  | -0.01050400 | -0.24496300 |
| C | -8.11308600  | -2.37170400 | -1.09122600 |
| H | -4.28082900  | -2.10521100 | -0.91917100 |
| C | -5.94685200  | -3.35607200 | -1.40466100 |
| C | -7.72607300  | 3.52834000  | 1.04324900  |
| H | -5.79153900  | 4.42192700  | 1.40873100  |
| H | -9.46340800  | 2.37068500  | 0.58973100  |
| C | -7.33627800  | -3.46494600 | -1.47113500 |
| H | -9.19436100  | -2.46223200 | -1.14487600 |
| H | -5.31119700  | -4.18937300 | -1.69306800 |
| H | -8.29884300  | 4.40052600  | 1.34562800  |
| H | -7.80921200  | -4.38186100 | -1.81140600 |
| N | -5.52978200  | 0.11659600  | -0.13969100 |
| C | -9.36560300  | 0.37919100  | -1.46649000 |
| H | -8.74097500  | 0.71371700  | -2.30188700 |
| H | -9.96415600  | -0.47151000 | -1.80936100 |
| H | -10.05674700 | 1.19014300  | -1.21298000 |
| C | -9.40719900  | -0.47882500 | 0.91688200  |
| H | -10.00629600 | -1.34639200 | 0.62027400  |
| H | -8.81239200  | -0.76013500 | 1.79265200  |
| H | -10.09902400 | 0.31552100  | 1.21690700  |
| B | 4.61570000   | 0.45401300  | 0.10136600  |
| S | 3.19211100   | -1.78640500 | 1.75597500  |
| S | 7.32483400   | 0.10035400  | -1.41493000 |
| O | 3.54337100   | -1.16236400 | 3.04619500  |
| O | 8.78986800   | -0.03297400 | -1.33131000 |
| O | 2.42020800   | -3.04147900 | 1.74185800  |

Molecule-14

| Atoms | x           | y           | z           |
|-------|-------------|-------------|-------------|
| C     | 5.21516000  | 1.78908400  | 0.12646500  |
| C     | 4.90151600  | 2.93289800  | 0.89319200  |
| C     | 6.47119100  | 1.78480800  | -0.51305600 |
| C     | 5.80235500  | 3.99288900  | 1.01993600  |
| H     | 3.94917800  | 2.97651300  | 1.41579500  |
| C     | 7.37934700  | 2.83113000  | -0.40788600 |
| C     | 7.04392600  | 3.93863300  | 0.37976900  |
| H     | 5.54039900  | 4.85655900  | 1.62545900  |
| H     | 8.34349100  | 2.76768000  | -0.90608500 |
| C     | 2.75992600  | 0.56498700  | 0.29460800  |
| C     | 2.00423900  | 1.55925900  | -0.36425600 |
| C     | 2.02009100  | -0.48208400 | 0.87919600  |
| C     | 0.61394700  | 1.49538100  | -0.43521100 |
| H     | 2.51947100  | 2.38995200  | -0.84024100 |
| C     | 0.63678000  | -0.55928600 | 0.83276300  |
| C     | -0.09679500 | 0.43134800  | 0.15037800  |
| H     | 0.06937900  | 2.29058300  | -0.93676000 |
| H     | 0.13486700  | -1.41570000 | 1.27600300  |

|   |              |             |             |
|---|--------------|-------------|-------------|
| C | 5.00682600   | -0.88283300 | 0.11617900  |
| C | 4.48980400   | -2.00578900 | 0.78794100  |
| C | 6.18888900   | -1.09895800 | -0.61581000 |
| C | 5.09750600   | -3.25751100 | 0.75088500  |
| C | 6.82329400   | -2.33616200 | -0.68189200 |
| C | 6.27164400   | -3.42022700 | 0.00852300  |
| H | 4.64672700   | -4.09735800 | 1.27310900  |
| H | 7.74699700   | -2.44451500 | -1.24437000 |
| H | 6.75697400   | -4.39193400 | -0.03166200 |
| H | 7.75225300   | 4.75562700  | 0.49107400  |
| C | -1.57631600  | 0.35816600  | 0.06462200  |
| C | -2.34010200  | -0.11338800 | 1.14777000  |
| C | -2.25379700  | 0.75988200  | -1.10099200 |
| C | -3.73082900  | -0.17605300 | 1.07068200  |
| H | -1.84555500  | -0.41148800 | 2.06799000  |
| C | -3.64419200  | 0.69374400  | -1.18107500 |
| H | -1.68773200  | 1.09957000  | -1.96399800 |
| C | -4.39095400  | 0.22684100  | -0.09460800 |
| H | -4.31332800  | -0.53279400 | 1.91554500  |
| H | -4.15870300  | 0.99527700  | -2.08927700 |
| C | -6.58391600  | 1.27922600  | 0.21296000  |
| C | -6.42900800  | -1.02064800 | -0.64659800 |
| C | -5.93513300  | 2.44203000  | 0.68000800  |
| C | -7.99340300  | 1.25094600  | 0.14184300  |
| C | -7.83350900  | -1.11910700 | -0.74362500 |
| C | -5.62717600  | -2.11787300 | -1.02561300 |
| C | -6.66204200  | 3.56198200  | 1.07100700  |
| H | -4.85356400  | 2.46804800  | 0.73789800  |
| C | -8.69324800  | 2.39785100  | 0.54390300  |
| C | -8.77551600  | 0.02685600  | -0.35202600 |
| C | -8.37485800  | -2.32221000 | -1.21956300 |
| H | -4.54852500  | -2.04790300 | -0.95222400 |
| C | -6.19882200  | -3.29672900 | -1.49359100 |
| C | -8.05574100  | 3.54847200  | 1.00521700  |
| H | -6.13281000  | 4.44240200  | 1.42688200  |
| H | -9.77853800  | 2.39248700  | 0.49529300  |
| C | -7.58599200  | -3.40840200 | -1.59478900 |
| H | -9.45430600  | -2.41484400 | -1.30013100 |
| H | -5.55394900  | -4.12472200 | -1.77675500 |
| H | -8.63805600  | 4.41460800  | 1.30683600  |
| H | -8.04796500  | -4.32217200 | -1.95787600 |
| N | -5.82191700  | 0.16066000  | -0.17592800 |
| C | -9.62414900  | 0.43211700  | -1.58966200 |
| H | -8.97942900  | 0.77985800  | -2.40414100 |
| H | -10.21165000 | -0.41495900 | -1.95962700 |
| H | -10.32343500 | 1.23798200  | -1.34211000 |
| C | -9.72388900  | -0.45972000 | 0.77935100  |
| H | -10.31340100 | -1.32408900 | 0.45539600  |
| H | -9.15076300  | -0.75242100 | 1.66578300  |
| H | -10.42493300 | 0.32889800  | 1.07308200  |

|    |            |             |             |
|----|------------|-------------|-------------|
| B  | 4.31071900 | 0.52091900  | 0.17866900  |
| O  | 2.06534800 | -3.22250300 | 1.87794400  |
| O  | 8.58071500 | 0.16924500  | -1.71653500 |
| Se | 2.94619200 | -1.80720800 | 1.99371700  |
| Se | 6.91868800 | 0.33269000  | -1.75417800 |

---
